# Supplementary material for: One-pot highly enantio- and diastereoselective synthesis of anti,anti vinylic 3-amino-1,2 diols via proline catalyzed sequential α-amination/ benzoyloxyallylation of aldehydes
Source: Royal Society of Chemistry journal article supplement (doi:10.1039/c5ra02830b), 2015-01-01
Supplement: c5ra02830b1.pdf [file c5ra02830b1.pdf]

**Electronic Supplementary Information(ESI)**

**One-Pot Highly Diastereoselective Synthesis of *anti,anti* Vinylic 3-amino-1,2 diols via  
Proline Catalyzed Sequential  $\alpha$ -Amination/Benzoyloxyallylation of Aldehydes**

*Brij Bhushan Ahuja and Arumugam Sudalai\**

Chemical Engineering & Process Development Division, National Chemical Laboratory, Dr.  
Homi Bhabha Road, Pune-411008 Maharashtra, India. India, Fax: (+) 91-02025902675.

E-mail: a.sudalai@ncl.res.in

**Table of Contents**

| <b><u>Sr.No.</u></b> | <b><u>Description</u></b>                                                 | <b><u>Page No.</u></b> |
|----------------------|---------------------------------------------------------------------------|------------------------|
| <b>1</b>             | <b>General information</b>                                                | <b>2</b>               |
| <b>2</b>             | <b>Experimental section</b>                                               | <b>2-12</b>            |
| <b>3</b>             | <b><math>^1\text{H}</math> and <math>^{13}\text{C}</math> NMR Spectra</b> | <b>13-29</b>           |
| <b>4</b>             | <b>HPLC Chromatogram</b>                                                  | <b>30-40</b>           |
| <b>5</b>             | <b>HRMS Data</b>                                                          | <b>41-56</b>           |

## EXPERIMENTAL SECTION

### General Description

Solvents were purified and dried by standard procedures before use; petroleum ether of boiling range 60–80 °C was used. Melting points are uncorrected. Optical rotations were measured using sodium D line on a JASCO P-2000 polarimeter. Infrared spectra were recorded on Shimadzu FTIR-8400 spectrometer. The wave numbers ( $\nu$ ) of recorded IR-signals are quoted in  $\text{cm}^{-1}$ .  $^1\text{H}$  and  $^{13}\text{C}$  NMR were recorded on Bruker AV-200, AV-400 and AV-500 NMR spectrometers, respectively. HRMS mass spectra were recorded on a Thermo Scientific Q-Exactive, Accela 1250 pump. HPLC was performed on Agilent chromatogram with variable wavelength detector. Purification was done using column chromatography (230–400 mesh).

### General Experimental Procedure:

#### General experimental procedure for sequential $\alpha$ -amination/benzoyloxyallylation of Aldehydes:

To a cooled solution of azadicarboxylate (5.0 mmol) and L-proline (10 mol%) in dry  $\text{CH}_3\text{CN}$  (20 mL) at 0 °C was added aldehydes (**1a-j**, 5 mmol) and the mixture was stirred for 3 h at 0 °C. This was followed by the addition of zinc powder (7.5 mmol), 3-benzoyloxyallyl bromide (7.5 mmol) and saturated aq.  $\text{NH}_4\text{Cl}$  (20 ml) at -20 °C for 2 h. The progress of the reaction can be monitored by TLC. After completion of the reaction, it was concentrated in vacuum to remove acetonitrile and the concentrate was extracted with ethyl acetate (3×40 mL). The combined organic layers were washed with brine, dried over anhyd.  $\text{Na}_2\text{SO}_4$ , and concentrated under reduced pressure to give the crude products, which were then purified by flash column chromatography (100-200 mesh) using petroleum ether and ethyl acetate (4:1) as eluents to afford the pure products **2a-j**.

**Diisopropyl 1-((2R,3R,4S)-4-(benzoyloxy)-3-hydroxyhex-5-en-2-yl)hydrazine-1,2-dicarboxylate (2a) R' = *i*-Pr:**

**Yield:** 79%; colorless solid; **mp** 110-112 °C; **IR** (CHCl<sub>3</sub>): 3303, 2982, 2932, 1708, 1386, 1267, 1105, 753, 712 cm<sup>-1</sup>; **<sup>1</sup>H NMR** (200 MHz, CDCl<sub>3</sub>): δ 1.20-1.34 (m, 15H), 4.17 (brs, 1H), 4.38 (brs, 1H), 4.9-5.03 (m, 2H), 5.30-5.48 (m, 3H), 5.98-6.15 (m, 1H), 6.53 (brs, NH), 7.45 (t, *J* = 8.9 Hz, 2H), 7.57 (t, *J* = 6.3 Hz, 1H), 8.09 (d, *J* = 8.9 Hz, 1H); **<sup>13</sup>C NMR** (50 MHz, CDCl<sub>3</sub>): δ 11.0, 21.7, 54.6, 69.6, 69.9, 70.5, 73.9, 118.1, 128.2, 129.6, 132.9, 155.2, 156.5, 165.3; **HRMS (ESI, m/z):** calcd for C<sub>21</sub>H<sub>30</sub>N<sub>2</sub>O<sub>7</sub> [M+Na]<sup>+</sup> 445.1945, found 445.1938; **HPLC:** [Chiralpack AD-H, 2-Propanol/n-Hexane = 10/90, flow rate 0.5 mL/min, λ = 220 nm, retention time: (minor) 20.92 min, (major) 25.13 min, ee 77%]; [α]<sub>25</sub><sup>D</sup> +25.81 (c 3.78, CHCl<sub>3</sub>).

**Di-tert-butyl 1-((2R,3R,4S)-4-(benzoyloxy)-3-hydroxyhex-5-en-2-yl)hydrazine-1,2-dicarboxylate (2a) R' = *t*-Bu:**

**Yield:** 81%; gum; **IR** (CHCl<sub>3</sub>): 3304, 2983, 1705, 1267, 1106, 749 cm<sup>-1</sup>; **<sup>1</sup>H NMR** (200 MHz, CDCl<sub>3</sub>): δ 1.19 (d, *J* = 7.9 Hz, 3H), 1.48 (s, 18H), 4.17 (brs, 1H), 4.31 (brs, 1H), 5.30-5.46 (m, 3H), 5.99-6.16 (m, 1H), 6.31 (brs, NH), 7.44 (t, *J* = 7.9 Hz, 2H), 7.57 (t, *J* = 6.7 Hz, 1H), 8.09 (d, *J* = 7.1 Hz, 2H); **<sup>13</sup>C NMR** (50 MHz, CDCl<sub>3</sub>): δ 10.6, 28.1, 54.5, 73.6, 74.8, 81.9, 118.2, 128.3, 129.7, 133.1, 154.4, 165.3; **HRMS (ESI, m/z):** calcd for C<sub>23</sub>H<sub>34</sub>N<sub>2</sub>O<sub>7</sub> [M+Na]<sup>+</sup> 473.2263, found 473.2271. **HPLC:** [Chiralpack AD-H, 2-Propanol/n-Hexane = 10/90, flow rate 0.5 mL/min, λ = 220 nm, retention time: (major) 21.18 min and (minor) 28.90 min, ee 78%]; [α]<sub>25</sub><sup>D</sup> +56.57 (c 1.84, CHCl<sub>3</sub>).

**Dibenzyl 1-((2R,3R,4S)-4-(benzoyloxy)-3-hydroxyhex-5-en-2-yl)hydrazine-1,2-dicarboxylate (2a) R' = Bn:**

**Yield:** 84%; gum; **IR** (CHCl<sub>3</sub>): 3303, 2983, 1705, 1368, 1216, 749 cm<sup>-1</sup>; **<sup>1</sup>H NMR** (200 MHz, CDCl<sub>3</sub>): δ 1.18 (brs, 3H), 3.97-4.46 (m, 2H), 5.10 (s, 5H), 5.27-5.50 (m, 3H), 5.59 (brs, NH), 7.24 (s, 10H), 7.37 (s, 2H), 7.49 (s, 1H), 8.05 (d, *J* = 7.2 Hz, 2H); **<sup>13</sup>C NMR** (50 MHz, CDCl<sub>3</sub>): δ 14.2, 55.5, 67.5, 67.8, 73.9, 75.7, 118.1, 127.5, 128, 128.3, 128.4, 129.7, 129.9, 133.1, 135.3, 155.3, 156.7, 169.6; **HRMS (ESI, m/z):** calcd for C<sub>29</sub>H<sub>30</sub>N<sub>2</sub>O<sub>7</sub> [M+Na]<sup>+</sup> 541.1951, found 541.1951; **HPLC:** [Chiralpack AD-H, 2-Propanol/n-Hexane = 10/90, flow rate 0.5 mL/min, λ = 220 nm, retention time: (major) 68.41 min and (minor) 79.74 min, ee 93%]; [α]<sub>25</sub><sup>D</sup> +120.8 (c 0.9, CHCl<sub>3</sub>).

**Diisopropyl 1-((3R,4R,5S)-5-(benzoyloxy)-4-hydroxyhept-6-en-3-yl)hydrazine-1,2-dicarboxylate (2b):**

**Yield:** 87%; gum; **IR** (CHCl<sub>3</sub>): 3317, 2982, 1705, 1307, 1237, 741 cm<sup>-1</sup>; **<sup>1</sup>H NMR** (200 MHz, CDCl<sub>3</sub>): δ 0.91 (brs, 3H), 1.27 (s, 12H), 1.73 (brs, 2H), 4.13 (brs, 2H), 4.91-5.03 (m, 2H), 5.33-5.54 (m, 3H) 5.99-6.16 (m, 1H), 6.46 (brs, NH), 7.45 (t, *J* = 6.3 Hz, 2H), 7.58 (t, *J* = 6.7 Hz, 1H), 8.1 (s, 2H); **<sup>13</sup>C NMR** (50 MHz, CDCl<sub>3</sub>): δ 11.2, 18.1, 21.9, 61.1, 70.1, 70.6, 73.6, 75.1, 118.6, 128.3, 129.6, 129.7, 129.9, 133, 155.3, 156, 165.1; **HRMS (ESI, m/z):** calcd for C<sub>22</sub>H<sub>32</sub>N<sub>2</sub>O<sub>7</sub> [M+Na]<sup>+</sup> 459.2107, found 459.2091. **HPLC:** Chiralcel AS-H, 2-Propanol/n-Hexane = 10/90, flow rate 0.5 mL/min, λ = 220 nm, retention time: (major) 18.49 min and (minor) 28.39 min, ee 91%]; [α]<sub>25</sub><sup>D</sup> -2.8 (c 2.2, CHCl<sub>3</sub>).

**Diisopropyl 1-((3R,4R,5S)-5-(benzoyloxy)-4-hydroxy-2-methylhept-6-en-3-yl)hydrazine-1,2-dicarboxylate (2c)**

**Yield:** 83%; gum; **IR** (CHCl<sub>3</sub>): 3306, 2962, 1267, 1105, 754 cm<sup>-1</sup>; **<sup>1</sup>H NMR** (200 MHz, CDCl<sub>3</sub>): δ 0.94 (d, *J* = 6.7 Hz, 3H), 1.11 (d, *J* = 3.4 Hz, 3H), 1.23-1.32 (m, 12H), 2.12-2.34 (m, 1H), 4-

4.11 (m, 1H), 4.26 (t,  $J = 4.5$  Hz, 1H), 4.86-5.06 (m, 2H), 5.35-5.63 (m, 3H), 6.0-6.17 (m, 1H), 6.88 (brs, NH), 7.43 (t,  $J = 6.9$  Hz, 2H), 7.56 (t,  $J = 6.9$  Hz, 1H), 8.07 (d,  $J = 4.1$  Hz, 2H);  $^{13}\text{C}$  NMR (50 MHz,  $\text{CDCl}_3$ ):  $\delta$  19.6, 22, 27.7, 29.6, 63.7, 70.3, 70.8, 71.8, 72.5, 119.4, 128.4, 129.7, 129.8, 130, 133.1, 156, 156.2, 165.3; **HRMS (ESI, m/z)**: calcd for  $\text{C}_{23}\text{H}_{34}\text{N}_2\text{O}_7$   $[\text{M}+\text{Na}]^+$  473.2263, found 473.2253; **HPLC**: [Chiralpack AD-H, 2-Propanol/n-Hexane = 10/90, flow rate 0.5 mL/min,  $\lambda = 220$  nm, retention time: (major) 16.47 min and (minor) 19.82 min, ee 95%];  $[\alpha]_{25}^{\text{D}} +212.69$  (c 0.54,  $\text{CHCl}_3$ ).

**Diisopropyl 1-((4R,5R,6S)-6-(benzoyloxy)-5-hydroxyoct-7-en-4-yl)hydrazine-1,2-dicarboxylate (2d):**

**Yield**: 86%; viscous oil; **IR** ( $\text{CHCl}_3$ ): 3316, 2983, 1705, 1267, 1106, 749  $\text{cm}^{-1}$ ;  **$^1\text{H}$  NMR** (200 MHz,  $\text{CDCl}_3$ ):  $\delta$  0.98 (t,  $J = 6.2$  Hz, 3H), 1.28 (s, 12H), 1.6-1.87 (m, 4H), 4.14 (brs, 1H), 4.21 (brs, 1H), 4.92-5.0 (m, 2H), 5.30-5.57 (m, 3H), 5.99-6.16 (m, 1H), 6.69 (brs, NH), 7.44 (t,  $J = 6.8$  Hz, 2H), 7.57 (t,  $J = 5.5$  Hz, 1H), 8.09 (d,  $J = 5.9$  Hz, 2H);  $^{13}\text{C}$  NMR (50 MHz,  $\text{CDCl}_3$ ):  $\delta$  13.6, 19.3, 21.7, 26.5, 58.5, 69.8, 70.3, 73.5, 74.9, 118.3, 128.1, 129.5, 132.8, 155.3, 156.7, 165.4; **HRMS (ESI, m/z)**: calcd for  $\text{C}_{23}\text{H}_{34}\text{N}_2\text{O}_7$   $[\text{M}+\text{Na}]^+$  473.2258, found 473.2249; **HPLC**: [Chiralpack AD-H, 2-Propanol/n-Hexane = 10/90, flow rate 0.5 mL/min,  $\lambda = 220$  nm, retention time: (minor) 27.2 min and (minor) 30.607 min, ee 93%];  $[\alpha]_{25}^{\text{D}} +65.68$  (c 1.94,  $\text{CHCl}_3$ ).

**Diisopropyl 1-((3R,4R,5S)-5-(benzoyloxy)-4-hydroxy-1-(methoxymethoxy)hept-6-en-3-yl)hydrazine-1,2-dicarboxylate (2e):**

**Yield**: 87%; gum; **IR** ( $\text{CHCl}_3$ ): 3405, 2982, 2938, 1706, 1379, 1231, 1103  $\text{cm}^{-1}$ ;  **$^1\text{H}$  NMR** (200 MHz,  $\text{CDCl}_3$ ):  $\delta$  1.26 (s, 12H), 2.0 (brs, 2H), 3.24 (s, 3H), 3.54 (brs, 2H), 4.14 (brs, 1H), 4.38 (brs, 1H), 4.49 (s, 2H), 4.87-4.99 (m, 2H), 5.32-5.53 (m, 3H), 6.0-6.17 (m, 1H), 6.87 (brs, NH),

7.44 (t,  $J = 6.9$  Hz, 2H), 7.54 (t,  $J = 7.1$  Hz, 1H), 8.1 (d,  $J = 6.2$  Hz, 2H)  $^{13}\text{C}$  NMR (50 MHz,  $\text{CDCl}_3$ ):  $\delta$  21.8, 30.6, 54.8, 57.5, 65.2, 69.9, 70.4, 73.6, 74.7, 118.3, 128.2, 129.6, 132.9, 155.4, 165; **HRMS (ESI, m/z)**: calcd for  $\text{C}_{24}\text{H}_{36}\text{N}_2\text{O}_9$   $[\text{M}+\text{Na}]^+$  519.2318, found 519.2316; **HPLC**: [Chiralpack AD-H, 2-Propanol/n-Hexane = 10/90, flow rate 0.5 mL/min,  $\lambda = 220$  nm, retention time : (major) 24.01 min and (minor) 29.12 min, ee 93%];  $[\alpha]_{25}^{\text{D}}$  -6.61 (c 0.66,  $\text{CHCl}_3$ ).

**Di-tert-butyl 1-((3R,4R,5S)-5-(benzoyloxy)-1-(benzyloxy)-4-hydroxyhept-6-en-3-yl)hydrazine-1,2-dicarboxylate (2f):**

**Yield**: 84%; gum; **IR** ( $\text{CHCl}_3$ ): 3364, 2980, 1707, 1269, 1216, 749, 711  $\text{cm}^{-1}$ ;  $^1\text{H}$  NMR (200 MHz,  $\text{CDCl}_3$ ):  $\delta$  1.48 (s, 18H), 2.05 (brs, 2H), 3.61 (brs, 2H), 4.17 (brs, 1H), 4.42 (s, 2H), 4.51 (s, 1H), 5.31-5.54 (m, 3H), 6.02-6.18 (m, 1H), 6.81 (brs, NH), 7.27 (s, 5H), 7.44 (t,  $J = 7.3$  Hz, 2H), 7.56 (t,  $J = 7.2$  Hz, 1H), 8.11 (d,  $J = 7.3$  Hz, 2H);  $^{13}\text{C}$  NMR (50 MHz,  $\text{CDCl}_3$ ):  $\delta$  28.1, 29.6, 57.9, 68.1, 73.1, 73.7, 74.9, 81.1, 81.9, 118.3, 127.5, 128.3, 129.7, 129.8, 130.1, 132.9, 133.1, 137.9, 154.9, 165.2; **HRMS (ESI, m/z)**: calcd for  $\text{C}_{31}\text{H}_{42}\text{N}_2\text{O}_8$   $[\text{M}+\text{Na}]^+$  593.2838, found 593.2841; **HPLC**: [Chiralpack AD-H, 2-Propanol/n-Hexane = 10/90, flow rate 0.5 mL/min,  $\lambda = 220$  nm, retention time : (minor) 22.79 min and (major) 26.14 min, ee 93%];  $[\alpha]_{25}^{\text{D}}$  -5.88 (c 0.76,  $\text{CHCl}_3$ ).

**Diisopropyl 1-((3S,4R,5R)-3-(benzoyloxy)-4-hydroxynona-1,8-dien-5-yl)hydrazine-1,2-dicarboxylate (2g):**

**Yield**: 82%; gum; **IR** ( $\text{CHCl}_3$ ): 3305, 2981, 2923, 1704, 1267, 1105, 754  $\text{cm}^{-1}$ ;  $^1\text{H}$  NMR (200 MHz,  $\text{CDCl}_3$ ):  $\delta$  1.26 (s, 12H), 1.69-2.15 (m, 4H), 4.14 (brs, 1H), 4.22 (brs, 1H), 4.81-5.03 (m, 4H), 5.32-5.48 (m, 3H), 5.65-5.82 (m, 1H), 5.98-6.15 (m, 1H), 6.71 (brs, NH), 7.44 (t,  $J = 7.7$  Hz, 2H), 7.57 (t,  $J = 7.2$  Hz, 1H), 8.09 (d,  $J = 6.7$  Hz, 2H),  $^{13}\text{C}$  NMR (50 MHz,  $\text{CDCl}_3$ ):  $\delta$  22, 29.7,

30.6, 58.5, 70.2, 70.7, 73.8, 74.4, 115.3, 118.7, 128.3, 129.8, 133.1, 137.5, 155.4, 155.8, 165.5; **HRMS (ESI, m/z)**: calcd for C<sub>24</sub>H<sub>34</sub>N<sub>2</sub>O<sub>7</sub> [M+Na]<sup>+</sup> 485.2264, found 485.2267; **HPLC**: [Chiralpack AD-H, 2-Propanol/n-Hexane = 10/90, flow rate 0.5 mL/min, λ = 220 nm, retention time : (major) 12.530 min and (minor) 15.123 min, ee 95%]; [α]<sub>25</sub><sup>D</sup> +133.85 (c 0.84, CHCl<sub>3</sub>).

**Di-tert-butyl 1-((2R,3R,4S)-4-(benzoyloxy)-3-hydroxy-1-phenylhex-5-en-2-yl)hydrazine-1,2-dicarboxylate (2h):**

**Yield**: 84%; gum; **IR** (CHCl<sub>3</sub>): 3323, 2981, 1704, 1267, 1109, 842, 741 cm<sup>-1</sup>; **<sup>1</sup>H NMR** (200 MHz, CDCl<sub>3</sub>): δ 1.26-1.48 (m, 18H), 3.05 (brs, 2H), 4.35 (t, *J* = 7.9 Hz, 1H), 4.63 (brs, 1H), 5.32-5.64 (m, 3H), 6.04-6.21 (m, 1H), 7.11-7.26 (m, 5H), 7.44 (t, *J* = 7.5 Hz, 2H), 7.54 (d, *J* = 6.9 Hz 1H), 8.12 (t, *J* = 6.3 Hz, 2H); **<sup>13</sup>C NMR** (50 MHz, CDCl<sub>3</sub>): δ 28.1, 30.6, 60.5, 74.4, 74.8, 81.6, 82.1, 118.2, 126.4, 128.4, 128.6, 129.7, 130.1, 133, 134.1, 138.7, 154.7, 165.3; **HRMS (ESI, m/z)**: calcd for C<sub>29</sub>H<sub>38</sub>N<sub>2</sub>O<sub>7</sub> [M+Na]<sup>+</sup> 549.2577, found 549.2579; **HPLC**: [Chiralpack AD-H, 2-Propanol/n-Hexane = 10/90, flow rate 0.5 mL/min, λ = 220 nm, retention time: (major) 21.64 min and (minor) 32.11 min, ee 97%]; [α]<sub>25</sub><sup>D</sup> +130.4 (c 0.86, CHCl<sub>3</sub>).

**Di-tert-butyl 1-((2R,3R,4S)-4-(benzoyloxy)-3-hydroxy-1-(4-methoxyphenyl)hex-5-en-2-yl)hydrazine-1,2-dicarboxylate (2i):**

**Yield**: 81%; gum; **IR** (CHCl<sub>3</sub>): 3364, 2981, 2922, 1708, 1351, 1263, 1105, 833, 711 cm<sup>-1</sup>; **<sup>1</sup>H NMR** (200 MHz, CDCl<sub>3</sub>): δ 1.34-1.47 (s, 18H), 2.97 (brs, 2H), 3.74 (s, 3H), 4.26 (brs, 1H), 4.38 (brs, 1H), 5.34 (t, *J* = 8.5 Hz, 1H), 5.45 (dd, *J* = 5.4, 11.6 Hz, 1H), 5.6 (t, *J* = 5.4 Hz, 1H), 6.03-6.15 (m, 1H), 6.36 (brs, NH), 6.75 (d, *J* = 8.8 Hz, 2H), 7.02 (d, *J* = 8.8 Hz, 2H), 7.45 (t, *J* = 7.6 Hz, 2H), 7.57 (q, *J* = 7.6 Hz, 1H), 8.11 (dd, *J* = 7.1, 12.5 Hz, 2H); **<sup>13</sup>C NMR** (50 MHz, CDCl<sub>3</sub>): δ 28.2, 29.7, 55.1, 59.6, 74.4, 74.8, 81.4, 82.1, 114.1, 118.2, 128.3, 128.4, 129.3, 129.8, 130.1,

133.3, 134.2, 165.1, 165.3, 170.1; **HRMS (ESI, m/z)**: calcd for C<sub>30</sub>H<sub>40</sub>N<sub>2</sub>O<sub>8</sub> [M+H]<sup>+</sup> 557.2862, found 557.2875; **HPLC**: [Chiralpack AD-H, 2-Propanol/n-Hexane = 10/90, flow rate 0.5 mL/min, λ = 220 nm, retention time: (major) 26.608 min and (minor) 43.61 min, ee 99%]; [α]<sub>25</sub><sup>D</sup> +288.75 (c 0.4, CHCl<sub>3</sub>).

**Experimental procedure for the preparation of diisopropyl 1-((2R,3R,4S)-4-(benzoyloxy)-3,6-dihydroxyhexan-2-yl)hydrazine-1,2-dicarboxylate (3).**

Aminodiol **1a** (0.22 g; 0.5 mmol) was added dropwise to a solution of BH<sub>3</sub>.DMS (0.023 mL, 0.025 mmol) in dry THF (10 mL) at room temperature and then mixture was stirred for 3 h. The reaction flask was cooled at 0 °C and NaOH (0.02 g; 0.5 mmol) in ethanol (2 mL) was added to the reaction mixture followed by 30% H<sub>2</sub>O<sub>2</sub> (0.06 mL, 0.7 mmol). It was then allowed to stir at rt for 2 h and the product was extracted with ethyl acetate washed with brine, dried over Na<sub>2</sub>SO<sub>4</sub> and concentrated in vacuum. Purification by column chromatography over silica gel using petroleum ether and ethyl acetate as eluents (4:1) gave **3** as a colorless oil.

**Yield**: 75%; colorless oil; **IR** (CHCl<sub>3</sub>): 3372, 2091, 1706, 1671, 1511, 1363, 711 cm<sup>-1</sup>; **<sup>1</sup>H NMR** (200 MHz, CDCl<sub>3</sub>): δ 1.11-1.20 (m, 15H), 1.91-2.15 (m, 2H), 2.67 (brs, OH), 3.39 (brs, OH), 3.52-3.70 (m, 2H), 4.04 (brs, 1H), 4.30 (brs, 1H), 4.84-4.89 (m, 2H), 5.04 (t, *J* = 4.4 Hz, 1H), 7.03 (brs, NH), 7.36 (t, *J* = 7.8 Hz, 2H), 7.49 (t, *J* = 6.8 Hz, 1H), 7.98 (d, *J* = 6.8 Hz, 2H); **<sup>13</sup>C NMR** (50 MHz, CDCl<sub>3</sub>): δ 9.9, 21.9, 34.4, 54.5, 58.3, 70.1, 72.4, 73.8, 128.3, 129.7, 133.1, 155.2, 166.4; **HRMS (ESI, m/z)**: calcd for C<sub>17</sub>H<sub>25</sub>N<sub>2</sub>O<sub>8</sub> [M+H]<sup>+</sup> 441.2237, found 441.2238; [α]<sub>25</sub><sup>D</sup> +32.9 (c 0.21, CHCl<sub>3</sub>).

**Experimental procedure for the preparation of (3S,4R,5R)-5-((tert-butoxycarbonyl)amino)-4-hydroxyhexan-3-yl benzoate (4).**



The solution of vicinal amino diol **1c** (1g, 1.9 mmol) in MeOH (20 mL) was treated with Raney Ni (0.5 g, excess) under H<sub>2</sub> atmosphere (80 psig) for 24 h. The reaction mixture was filtered over celite and concentrated to give crude product, which was dissolved in CH<sub>2</sub>Cl<sub>2</sub> (15 mL) and added NEt<sub>3</sub> (0.26 mL, 1.9 mmol) followed by Boc<sub>2</sub>O (0.42 g, 1.9 mmol) and reaction mixture was stirred for 1 h at room temperature. After completion of reaction was quenched with water and extracted with CH<sub>2</sub>Cl<sub>2</sub> (3 X 15 mL) and concentrate to give crude product which was purified by flash column chromatography (100-200 mesh) using petroleum ether and ethyl acetate (4:1) as eluents to afford the pure product **4**.

**Yield:** 89%; gum; **IR** (CHCl<sub>3</sub>): 3335, 2918, 1734, 1695, 749 cm<sup>-1</sup>; **<sup>1</sup>H NMR** (200 MHz, CDCl<sub>3</sub>): δ 0.98 (t, *J* = 7.3 Hz, 3H), 1.17 (d, *J* = 6.8 Hz, 2H), 1.45 (s, 9H), 1.70 (brs, 1H), 1.78-1.85 (m, 1H), 1.93-1.99 (m, 1H), 3.87 (brs, 1H), 4.78-4.83 (m, 1H), 5.09-5.15 (m, 1H), 7.45 (t, *J* = 7.3 Hz, 2H), 7.58 (t, *J* = 7.7 Hz, 1H), 8.05-8.07 (dd, *J* = 1.3, 8.2 Hz, 2H); **<sup>13</sup>C NMR** (50 MHz, CDCl<sub>3</sub>): δ 9.6, 15.7, 23.7, 28.4, 48.4, 75.1, 76.2, 79.6, 128.5, 129.7, 133.1, 155.8, 166.3; **HRMS (ESI, m/z):** calcd for C<sub>18</sub>H<sub>27</sub>NO<sub>5</sub> [M+Na]<sup>+</sup> 360.1786, found 360.1792; [α]<sup>25</sup><sub>D</sub> +29.1 (c 1.0 in CHCl<sub>3</sub>).

**Dibenzyl 1-((2S,3S,4R)-4-(benzyloxy)-1-(benzyloxy)-3-hydroxyhex-5-en-2-yl)hydrazine-1,2-dicarboxylate (*ent*-2j):**

**Yield:** 85%; gum; **IR** (CHCl<sub>3</sub>): 3309, 2979, 1706, 1262, 752 cm<sup>-1</sup>; **<sup>1</sup>H NMR** (200 MHz, CDCl<sub>3</sub>): δ 3.81 (brs, 2H), 4.36 (s, 2H), 4.42 (brs, 1H), 4.57 (brs, 1H), 5.13 (s, 4H), 5.29-5.39 (m, 2H), 5.52 (brs, 1H), 5.94-6.08 (m, 1H), 6.79 (brs, NH), 7.19-7.28 (m, 15H), 7.41 (d, *J* = 7.3 Hz, 2H), 7.52 (s, 1H), 8.06 (d, *J* = 6.8 Hz, 2H); **<sup>13</sup>C NMR** (50 MHz, CDCl<sub>3</sub>): δ 58.6, 67.9, 68.2, 68.7, 73.1, 74.7, 75.6, 118.7, 127.7, 127.8, 128.2, 128.4, 128.4, 128.5, 129.8, 133.1, 135.4, 135.7, 137.5, 155.6, 165.3; **HRMS (ESI, m/z):** calcd for C<sub>36</sub>H<sub>36</sub>N<sub>2</sub>O<sub>8</sub> [M+H]<sup>+</sup> 625.255, found

625.2517; **HPLC**: [Chiralpack AD-H, 2-Propanol/n-Hexane = 10/90, flow rate 0.5 mL/min,  $\lambda$  = 220 nm, retention time: (major) 86.00 min and (minor) 93.6 min, ee 93%];  $[\alpha]_{25}^D$  +288.75 (c 0.4, CHCl<sub>3</sub>).

**Experimental procedure for the preparation of Benzyl ((4S,5S)-4-((benzyloxy)methyl)-5-((R)-1-hydroxyallyl)-2-oxooxazolidin-3-yl)carbamate (5).**

To a solution of vicinal amino diol *ent-2j* (2 g, 3.6 mmol) in MeOH (20 ml) at room temperature was added LiOH.H<sub>2</sub>O (296 mg, 7.2 mmol) and the reaction mixture was stirred for 3 h. After completion of the reaction, it was diluted with water and the mixture was concentrated in vacuum to remove MeOH and the concentrate was extracted with ethyl acetate (3 × 40 ml). The combined organic layers were washed with brine, dried over anhydrous Na<sub>2</sub>SO<sub>4</sub> and concentrated under reduced pressure to give crude product, which was then purified by flash column chromatography using petroleum ether: ethyl acetate (2:3) to afford pure oxazolidinone **5**.

**Yield**: 71%; gum; **IR** (CHCl<sub>3</sub>): 3368, 2084, 1707, 1675, 1261, 750 cm<sup>-1</sup>; **<sup>1</sup>H NMR** (200 MHz, CDCl<sub>3</sub>):  $\delta$  3.72 (q,  $J$  = 9.6 Hz, 2H), 4.08 (brs, 1H), 4.33 (s, 1H), 4.48 (t,  $J$  = 6.9 Hz 1H), 5.07 (s, 2H), 5.2 (d,  $J$  = 10.5 Hz, 1H), 5.35 (d,  $J$  = 17.4 Hz, 1H), 5.84-5.92 (m, 1H), 7.23-7.3 (m, 9H), 7.44 (t,  $J$  = 9.1 Hz, 1H); **<sup>13</sup>C NMR** (50 MHz, CDCl<sub>3</sub>):  $\delta$  58.4, 64.5, 67.7, 69.4, 71.1, 73.3, 117.3, 127.5, 127.7, 128, 128.1, 128.2, 128.4, 128.5, 135.2, 135.7, 136.6, 155.5, 156.6; **HRMS (ESI, m/z)**: calcd for C<sub>22</sub>H<sub>24</sub>N<sub>2</sub>O<sub>6</sub> [M+H]<sup>+</sup> 413.1712, found 413.1792;  $[\alpha]_{25}^D$  -88.96 (c 4.46, CHCl<sub>3</sub>).

**Experimental procedure for the preparation of benzyl ((4S,5S)-4-((benzyloxy)methyl)-5-((R,E)-1-hydroxypentadec-2-en-1-yl)-2-oxooxazolidin-3-yl)carbamate (6)**

To a solution of oxazolidinone **5** (1.3 g, 3.16 mmol) in 20 ml of dry CH<sub>2</sub>Cl<sub>2</sub> was added Grubbs<sup>Ind</sup> generation catalyst (5 mol%, 15 mg) followed by tetradecene (2.1 g, 10.8 mmol) and the resulting mixture was heated at reflux for 6 h. After completion of the reaction, it was concentrated to give the crude product, which was then purified by flash column chromatography (100-200 mesh) using petroleum ether and ethyl acetate (7:3) as eluents to afford the pure product **6**.

**Yield:** 81%; gum; **IR** (CHCl<sub>3</sub>): 3368, 2084, 1708, 1671, 1352, 642 cm<sup>-1</sup>; **<sup>1</sup>H NMR** (200 MHz, CDCl<sub>3</sub>): δ 0.88 (t, *J* = 7.1 Hz, 3H), 1.26 (s, 20 H), 2.03 (q, *J* = 7 Hz, 2H), 2.9 (brs, OH), 3.69-3.79 (m, 2H), 4.09 (brs, 1H), 4.31 (brs, 1H), 4.42 (brs, 1H), 4.51 (q, *J* = 11.6 Hz, 2H), 5.11 (q, *J* = 12.2 Hz, 2H), 5.49 (dd, *J* = 5.8, 9.7 Hz, 1H) 5.78 (m, 1H), 6.89 (brs, NH), 7.25-7.33 (m, 10H); **<sup>13</sup>C NMR** (50 MHz, CDCl<sub>3</sub>): δ 14.1, 22.7, 28.9, 29.2, 29.4, 29.5, 29.6, 29.7, 31.9, 32.3, 58.6, 64.5, 67.9, 69.6, 73.6, 77.8, 127.4, 128, 128.2, 128.3, 128.4, 128.5, 128.7, 135.3, 136.3, 155.4, 156.5; **HRMS (ESI, m/z):** calcd for C<sub>34</sub>H<sub>48</sub>N<sub>2</sub>O<sub>6</sub> [M+Na]<sup>+</sup> 581.3591, found 581.3573; [α]<sub>25</sub><sup>D</sup> -232.9 (c 0.34, CHCl<sub>3</sub>).

#### **Experimental procedure for the preparation of D-ribo-phytosphingosine tetraacetate (7).**

A solution of olefin **6** (1 g, 1.7 mmol) in MeOH (20 mL) was treated with Raney Ni (0.5 g, excess) under H<sub>2</sub> atmosphere (80 psig) for 24 h. The reaction mixture was filtered over celite to give crude product, in which was added K<sub>2</sub>CO<sub>3</sub> (248 mg, 1.8 mmol) and the reaction mixture was stirred for 6 h until consumption of the starting material and methanol was removed in vacuum. H<sub>2</sub>O was added to the crude product and extracted with ethyl acetate (3 X 10 mL), dried over Na<sub>2</sub>SO<sub>4</sub> and concentrated. The crude material was subsequently acetylated with acetic anhydride (0.72 mL, 7.65 mmol), pyridine (0.62 mL, 7.65 mmol) and DMAP (cat). After

overnight stirring, the solvent was evaporated and the residue was purified on a silica gel column using petroleum ether and ethyl acetate (5 : 1) as eluent to give tetraacetate **7** as a white solid. Spectroscopic data of tetraacetate are in full agreement with those reported in literature.

**Yield:** 76%; white solid; **mp:** 45-46 °C; **IR** (CHCl<sub>3</sub>): 2920, 1734, 1685, 749 cm<sup>-1</sup>; **<sup>1</sup>H NMR** (200 MHz, CDCl<sub>3</sub>): δ 0.88 (t, *J* = 7 Hz, 3H), 1.25 (brs, 24 H), 1.6-1.69 (m, 2H), 2.02 (s, 3H), 2.04 (s, 6H), 2.08 (s, 2H), 3.98 (dd, *J* = 2.9, 11.7 Hz, 1H), 4.29 (dd, *J* = 4.7, 11.6, Hz, 1H), 4.42-4.48 (m, 1H), 4.92 (dt, *J* = 3.1, 9.7 Hz, 1H), 5.09 (dd, *J* = 3.1, 8.3 Hz, 1H), 6.01 (d, *J* = 9.3 Hz, 1H); **<sup>13</sup>C NMR** (50 MHz, CDCl<sub>3</sub>): δ 14.1, 20.7, 20.8, 21.0, 22.7, 23.2, 25.5, 28.1, 29.3, 29.4, 29.5, 29.6, 29.6, 29.6, 29.7, 31.9, 47.6, 62.8, 71.9, 73.0, 169.5, 169.9, 170.7, 171.0; **HRMS (ESI, m/z):** calcd for C<sub>26</sub>H<sub>47</sub>NO<sub>7</sub> [M+H]<sup>+</sup> 486.3431, found 486.3435; [α]<sub>25</sub><sup>D</sup> +20.1 (c 1.0 in CHCl<sub>3</sub>); {lit. [α]<sub>D</sub><sup>25</sup> +20.9 (c 1.1 in CHCl<sub>3</sub>)}.

# $^1\text{H}$ and $^{13}\text{C}$ NMR spectra of new compounds

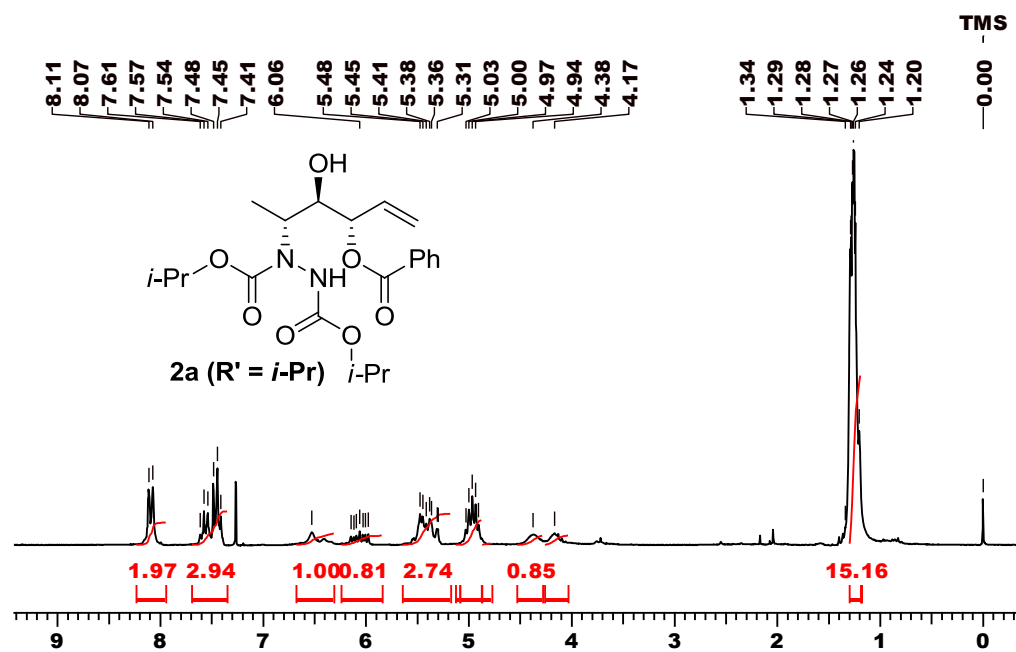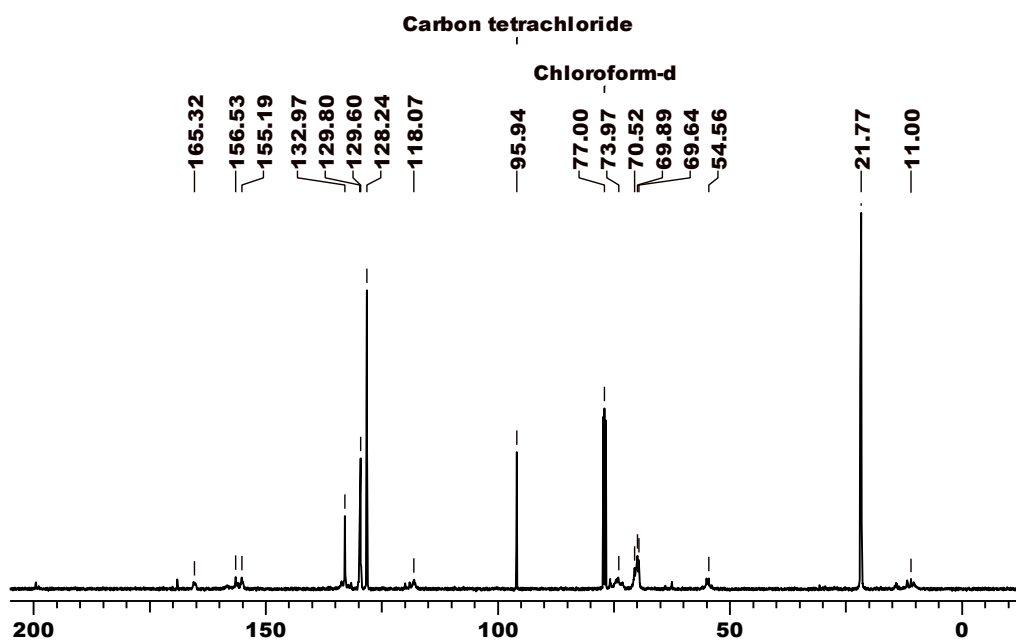

$^1\text{H}$  and  $^{13}\text{C}$  NMR spectra of 2a ( $\text{R}' = i\text{-Pr}$ )

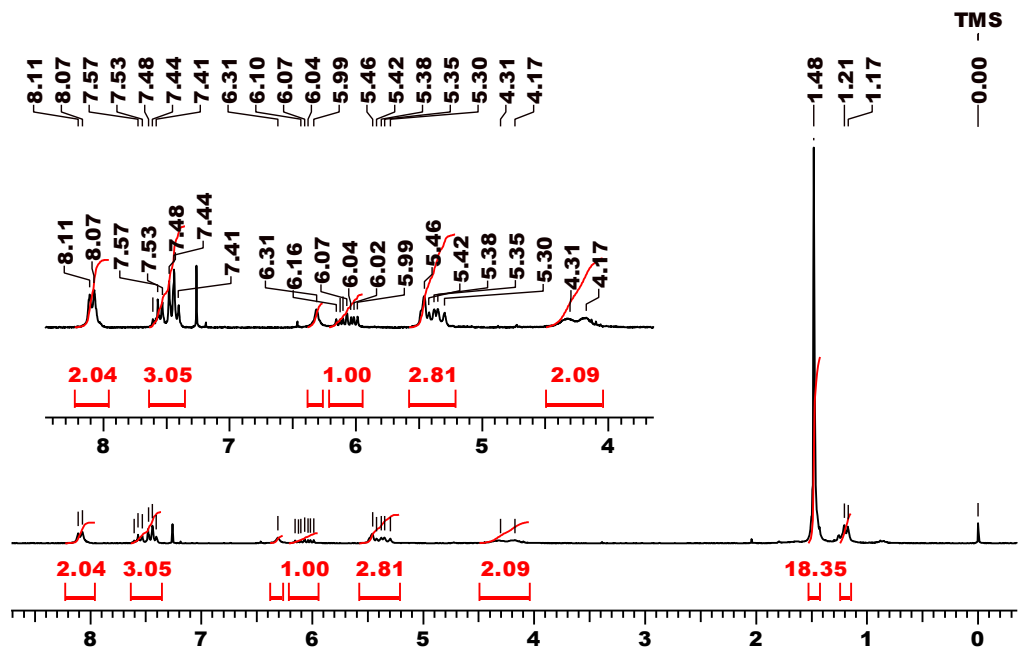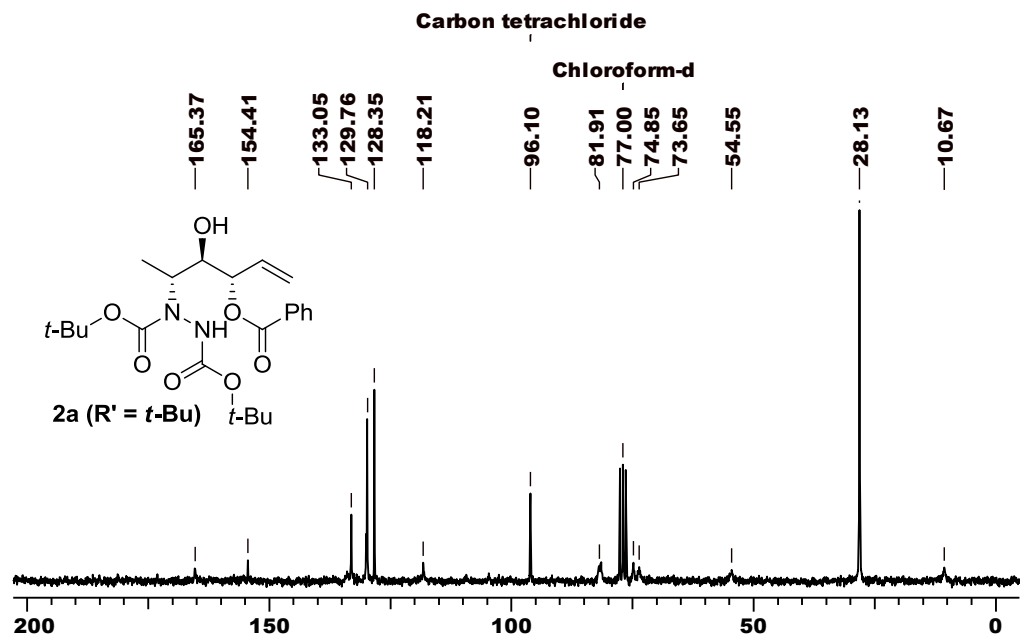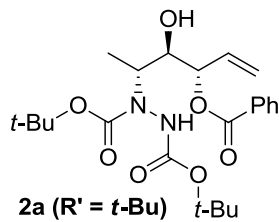

**<sup>1</sup>H and <sup>13</sup>C NMR spectra of 2a (R' = *t*-Bu)**

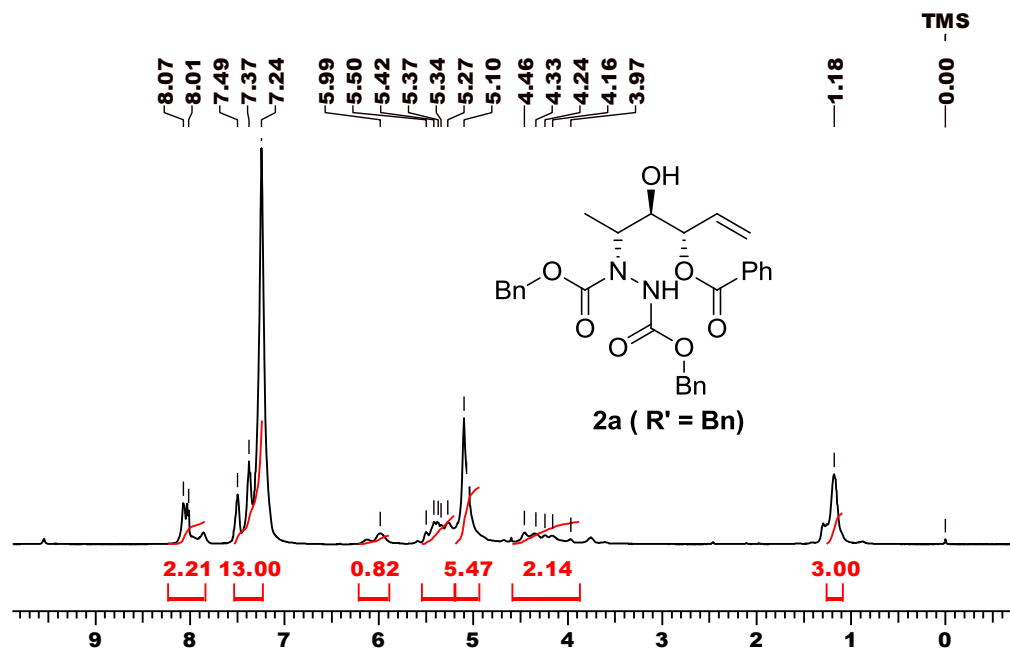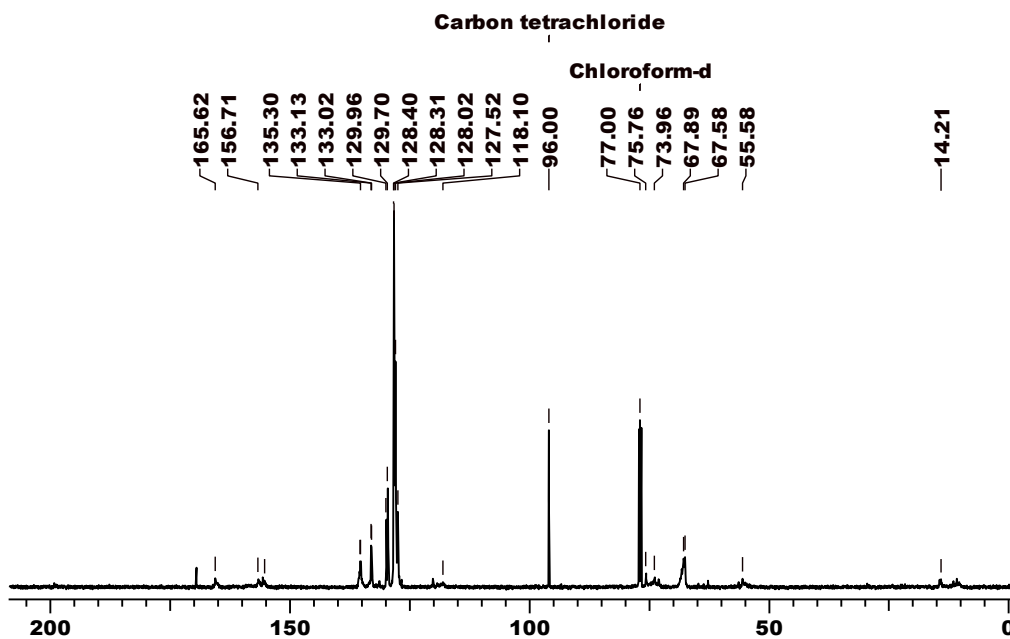

**<sup>1</sup>H and <sup>13</sup>C NMR spectra of 2a (R' = Bn)**

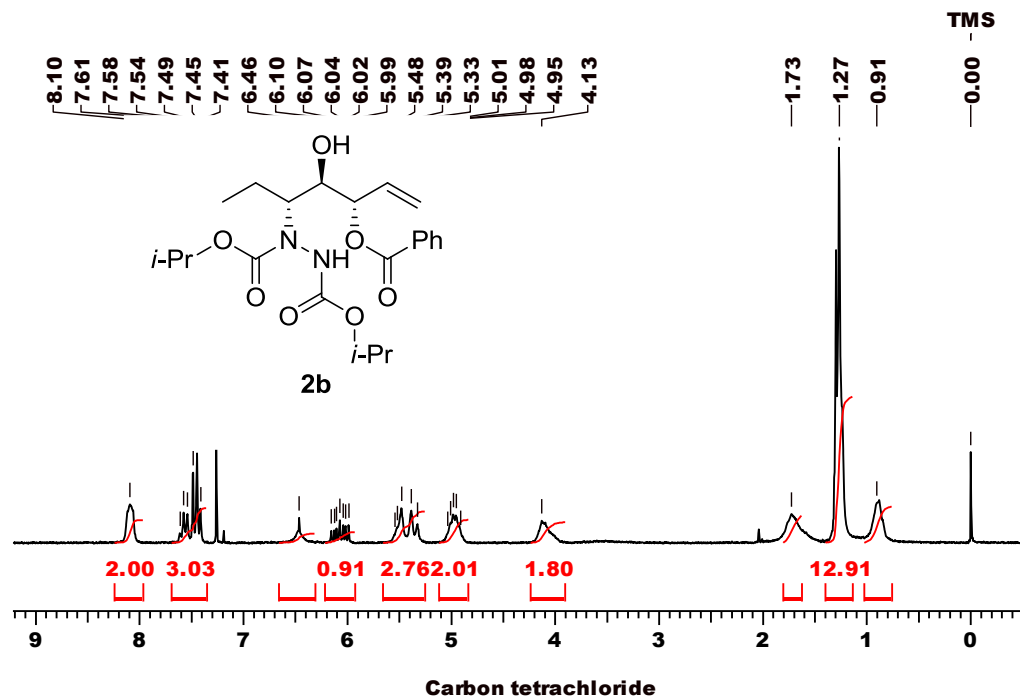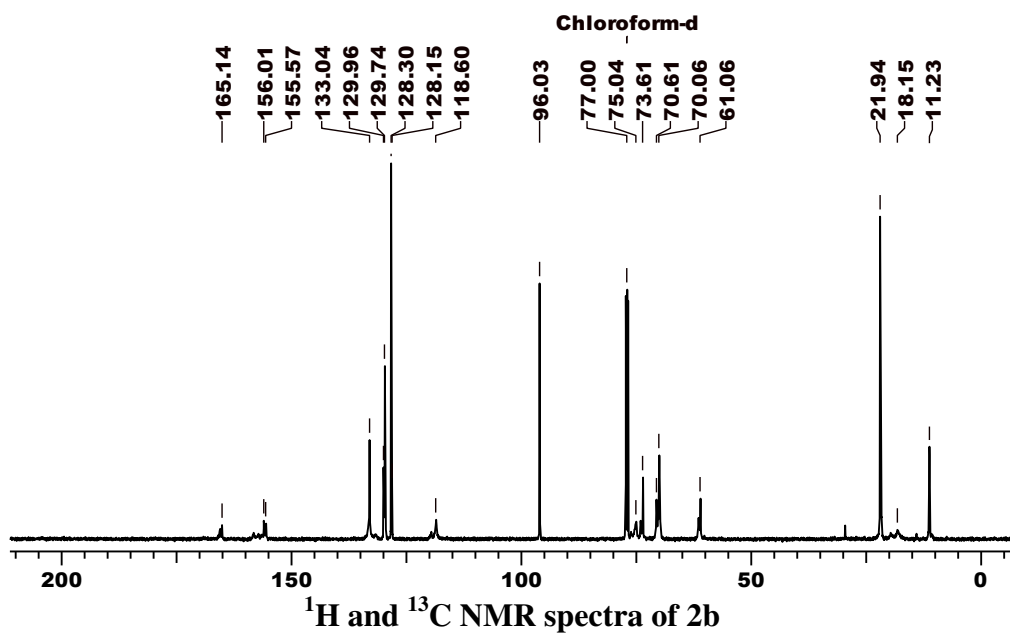



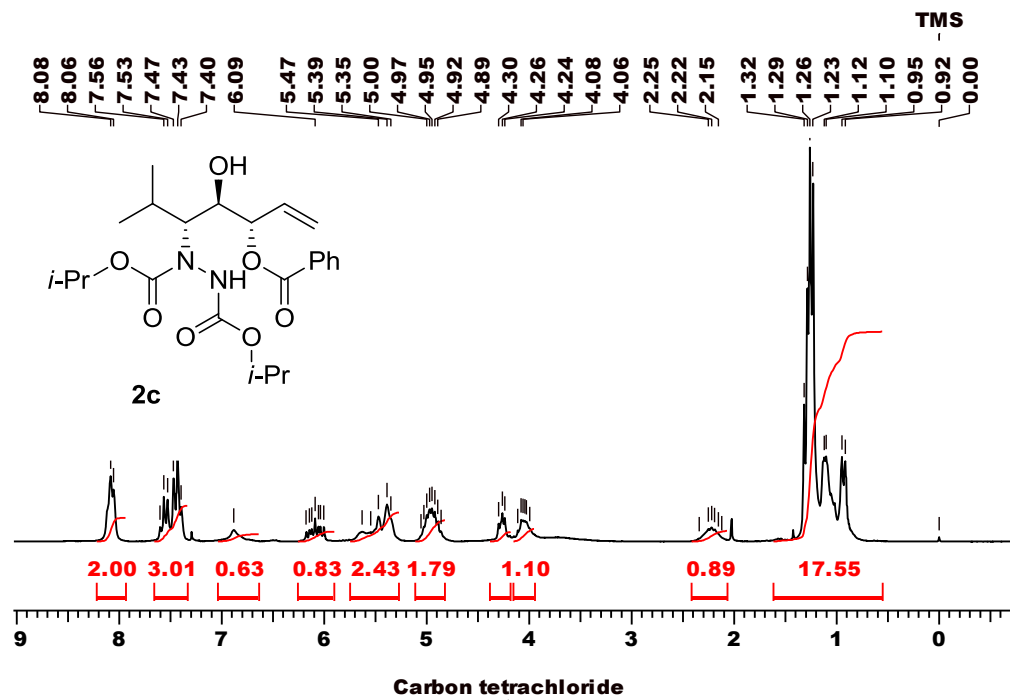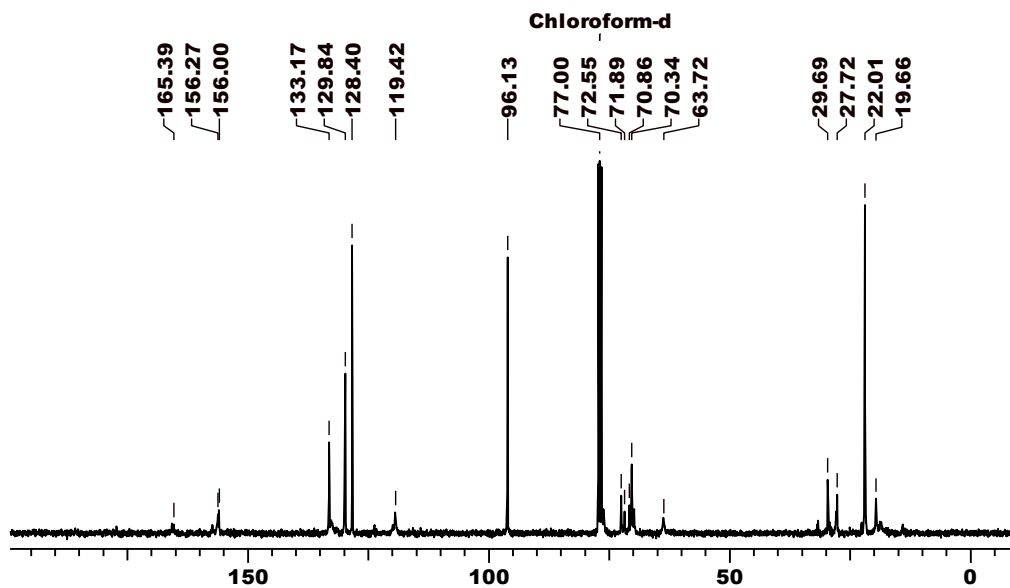

**<sup>1</sup>H and <sup>13</sup>C NMR spectra of 2c**

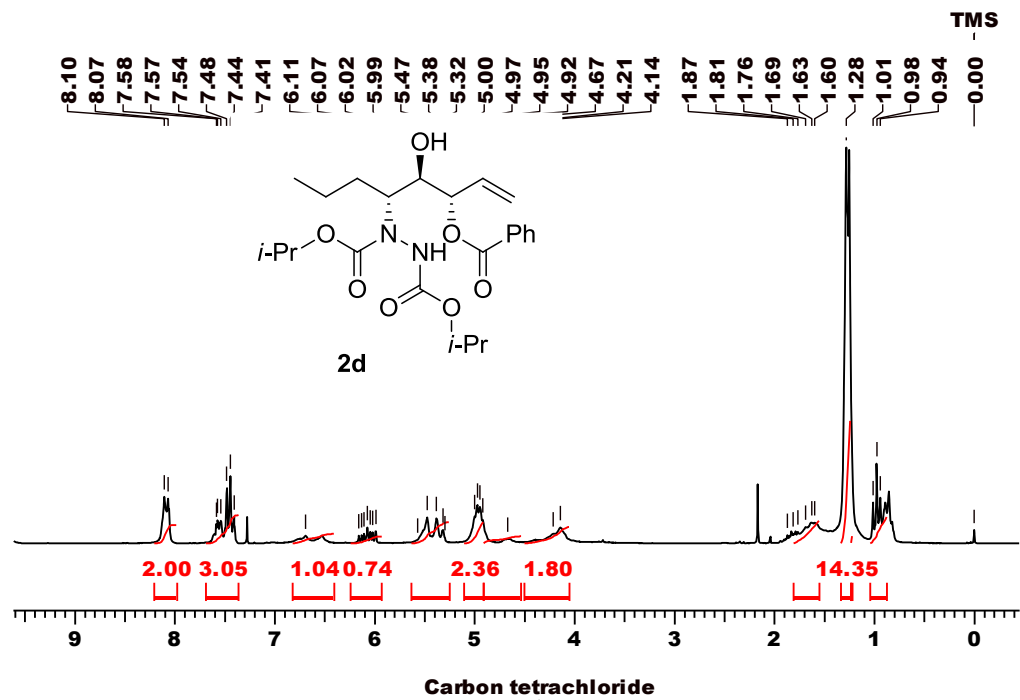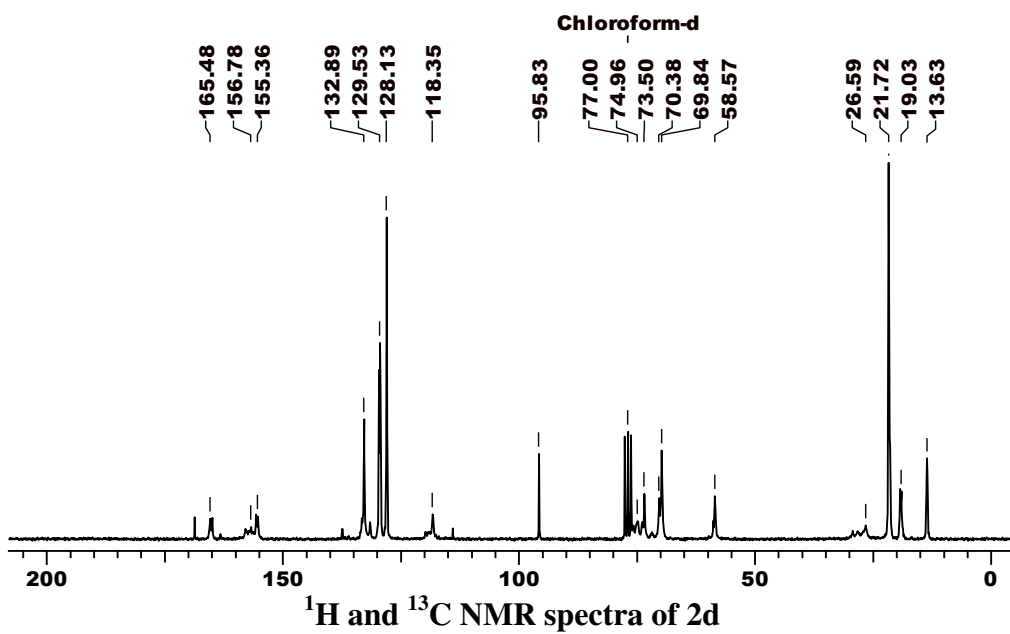

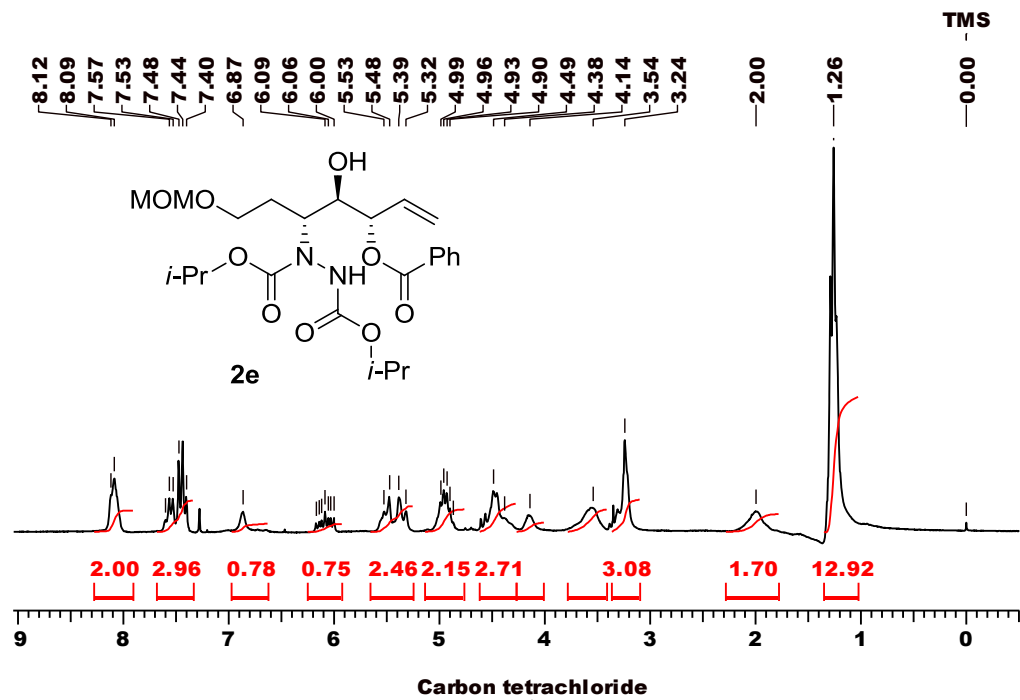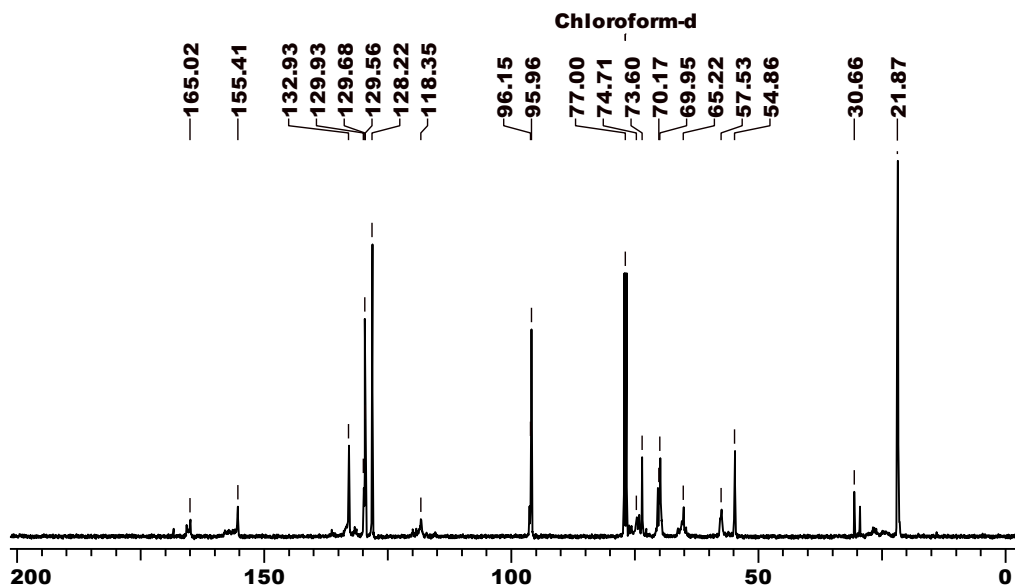

**<sup>1</sup>H and <sup>13</sup>C NMR spectra of 2e**

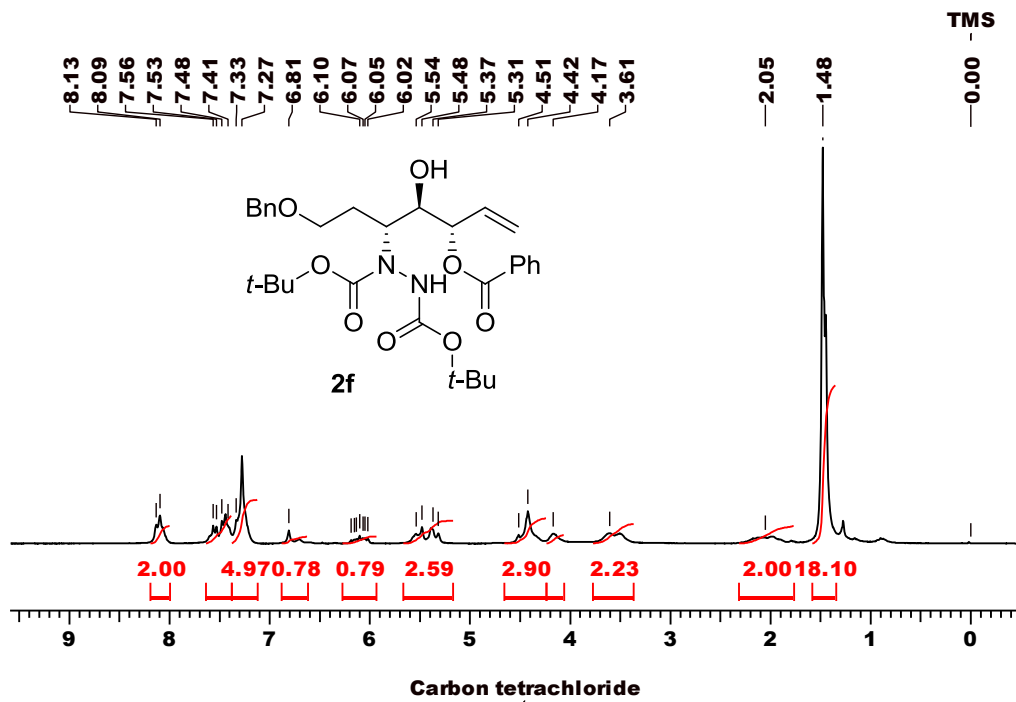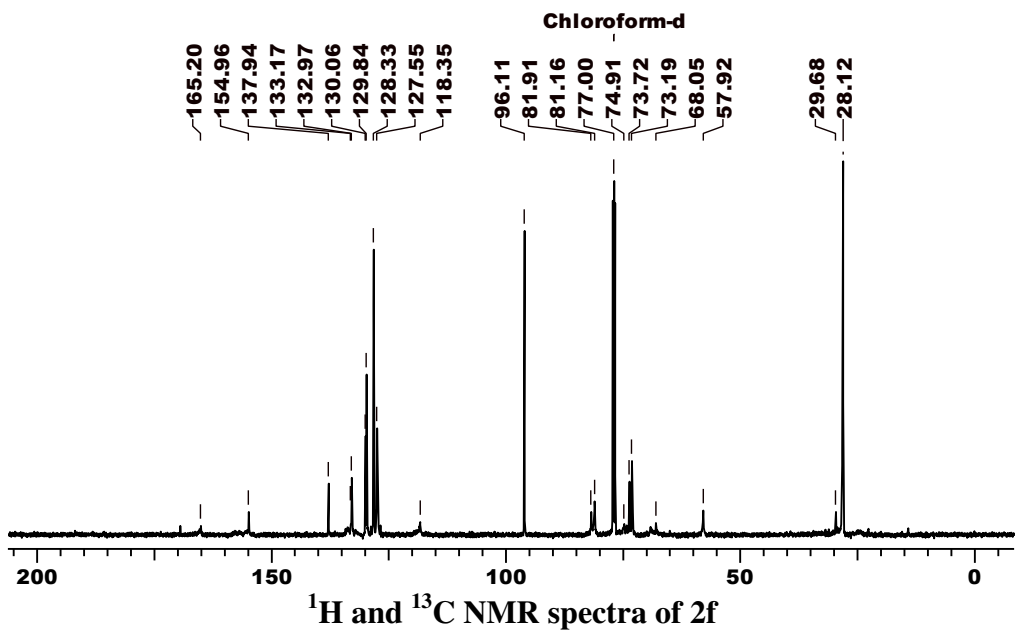

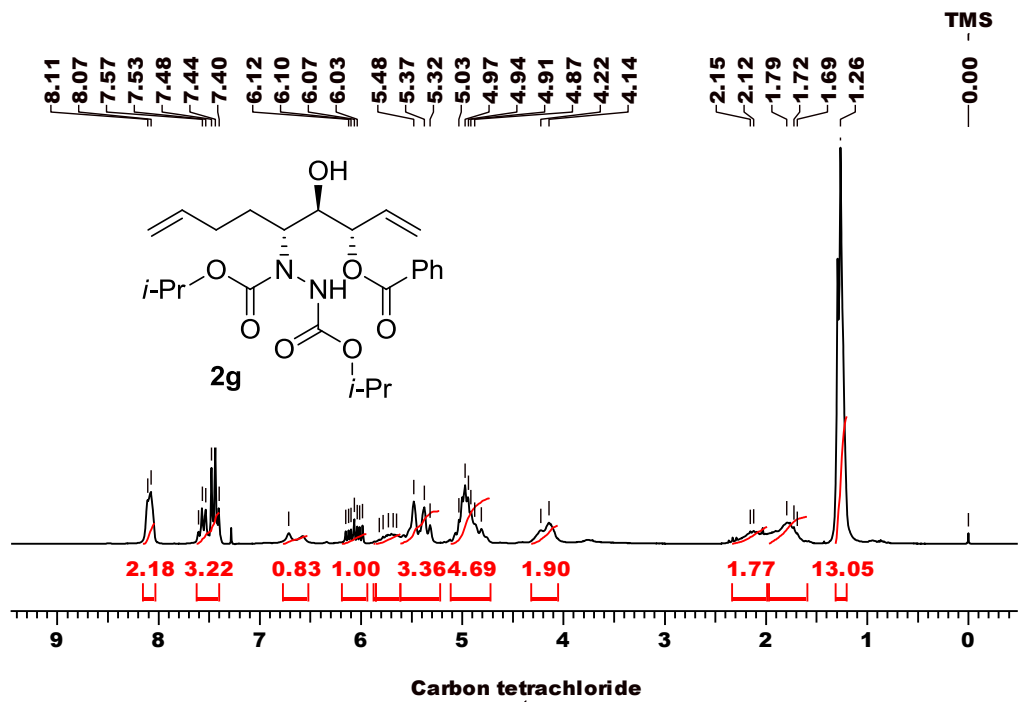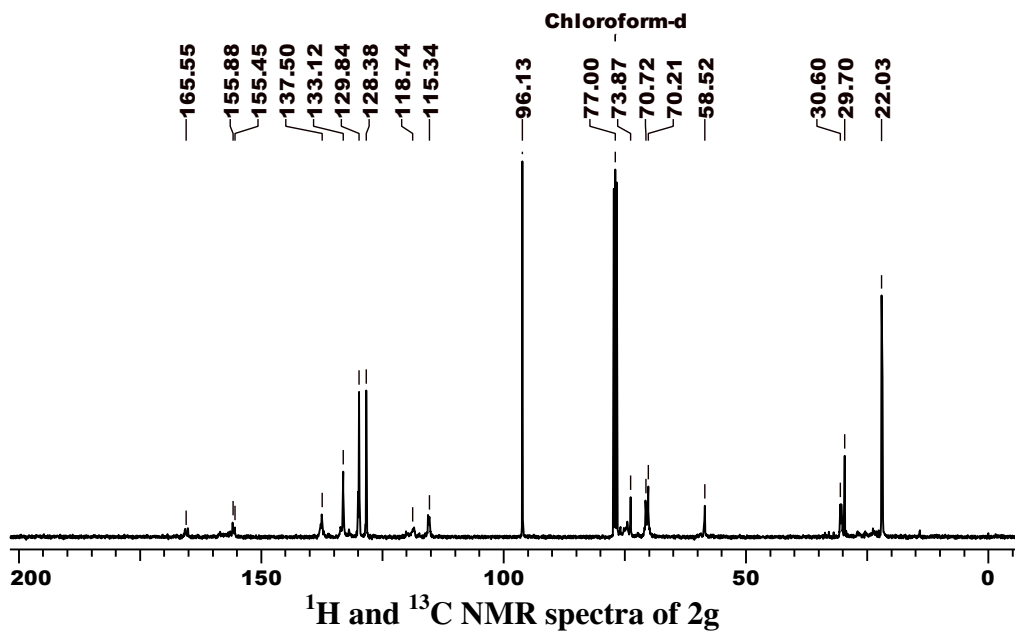

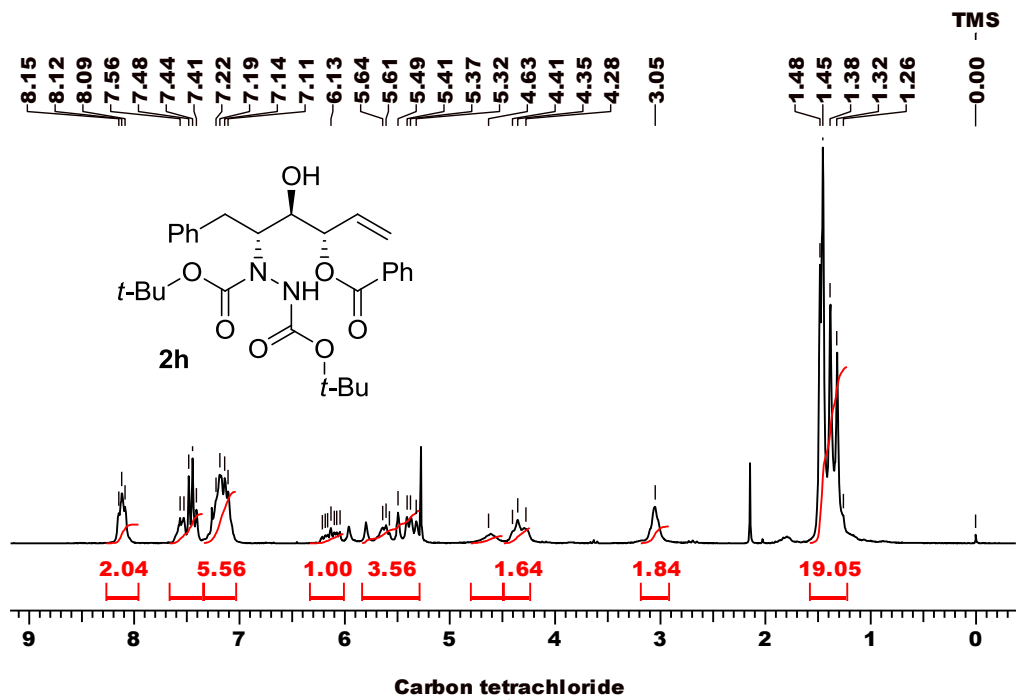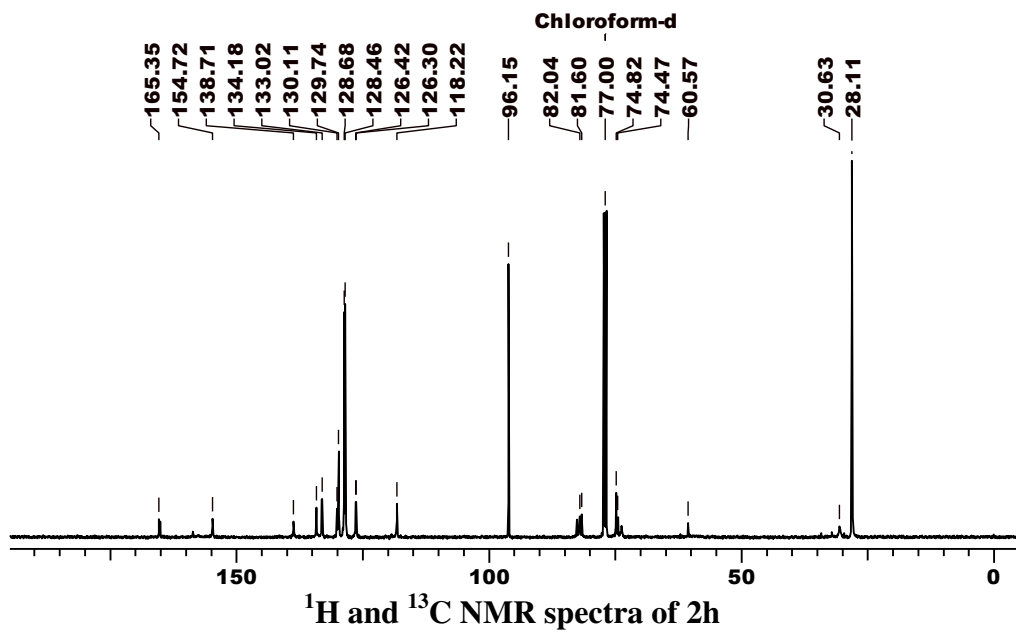

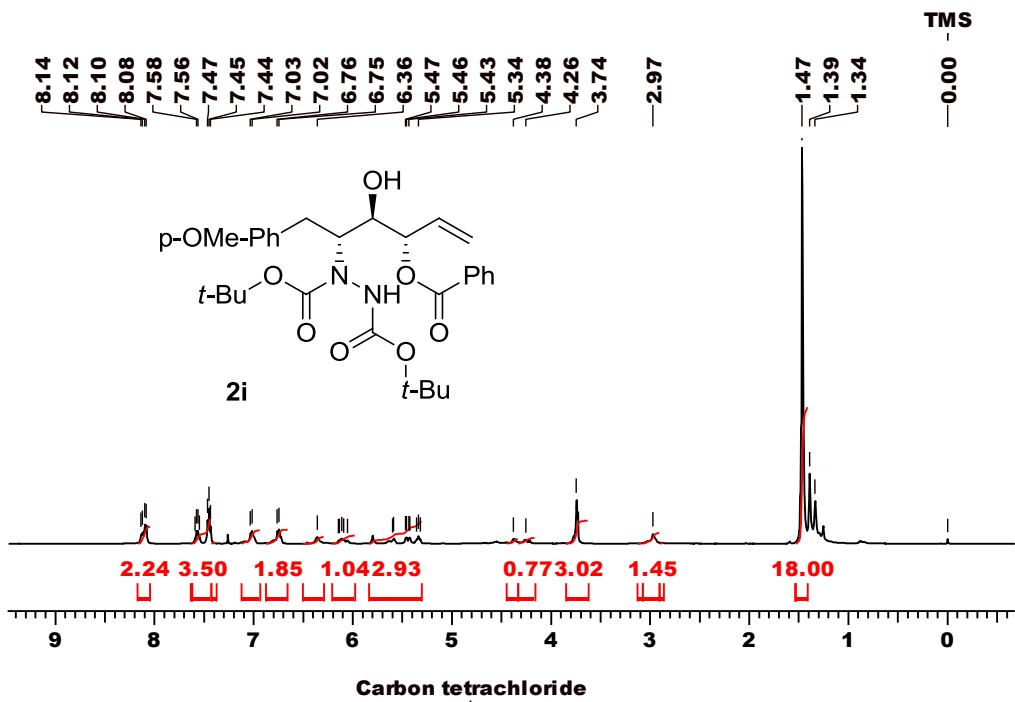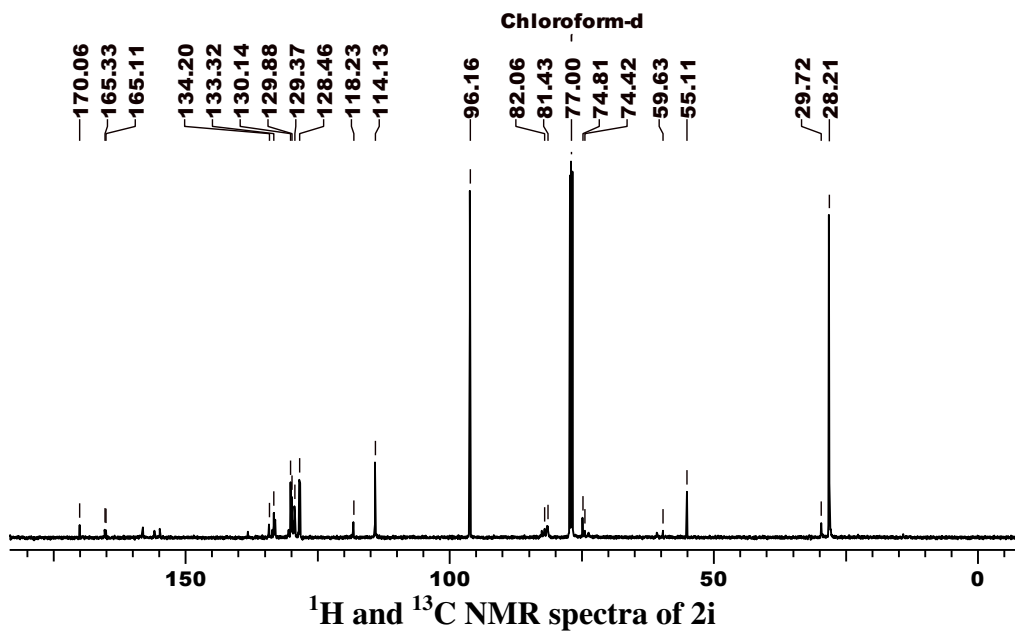

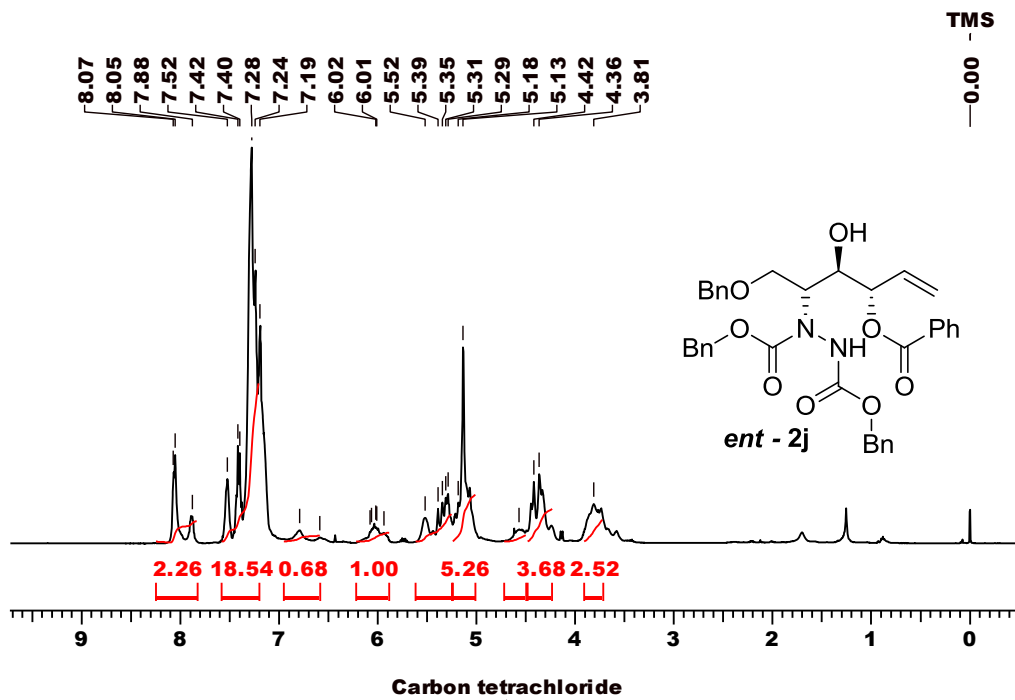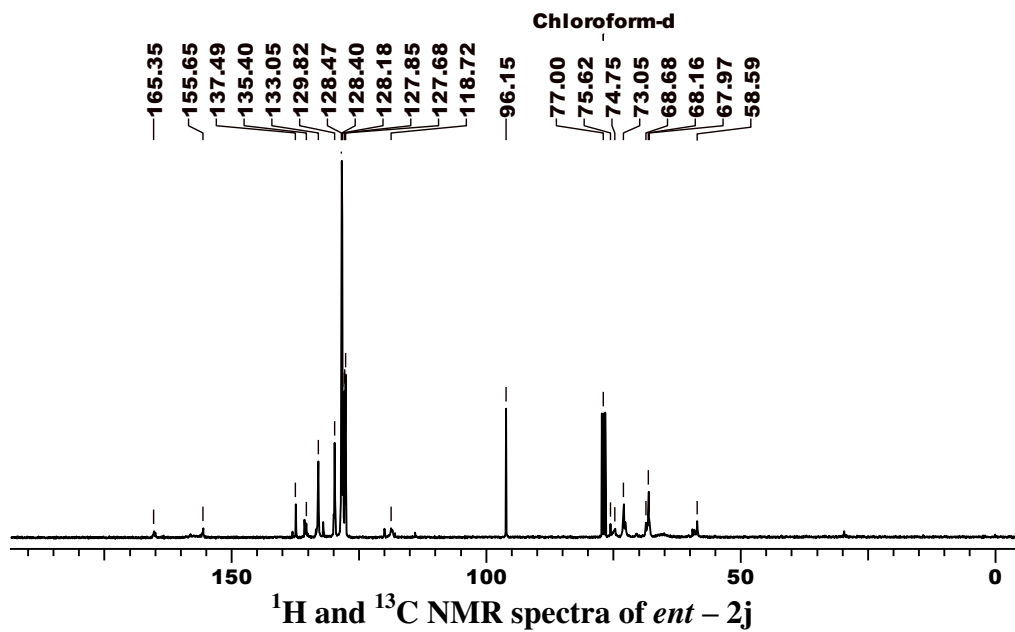



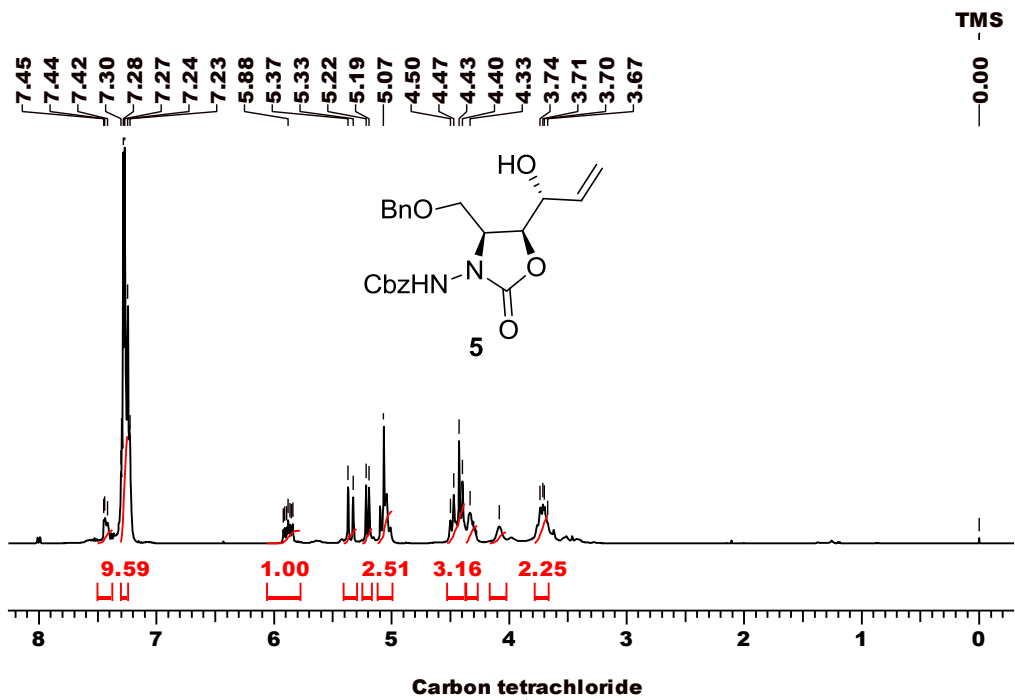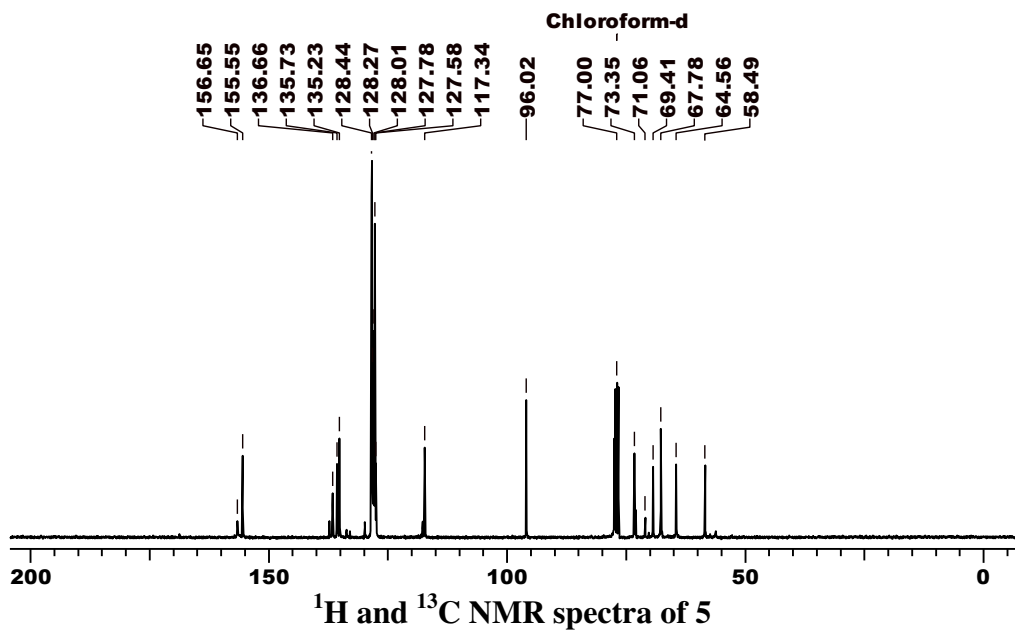

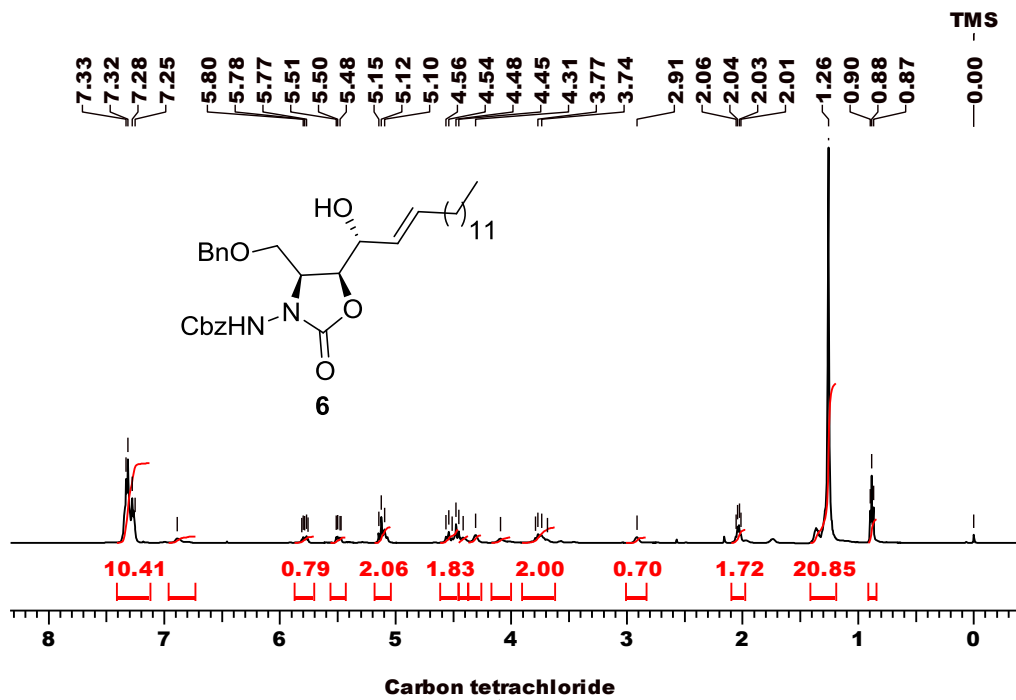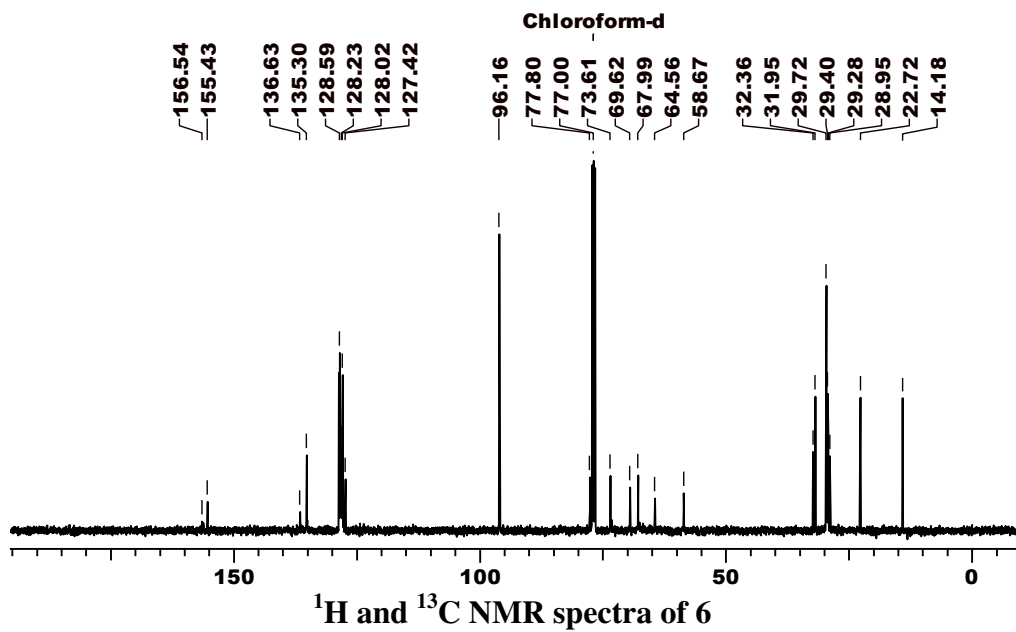

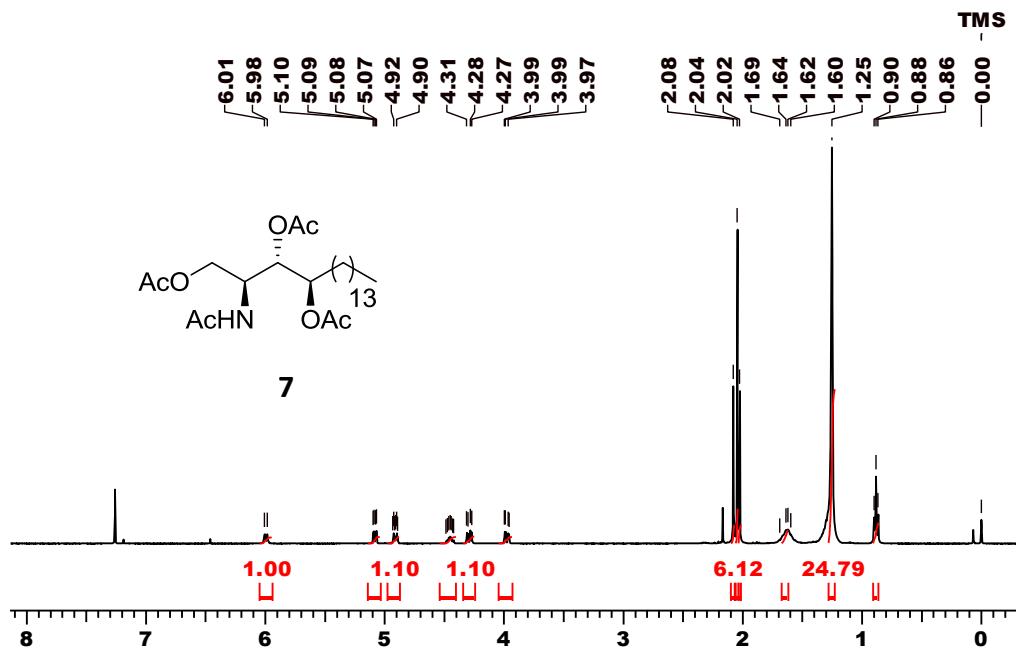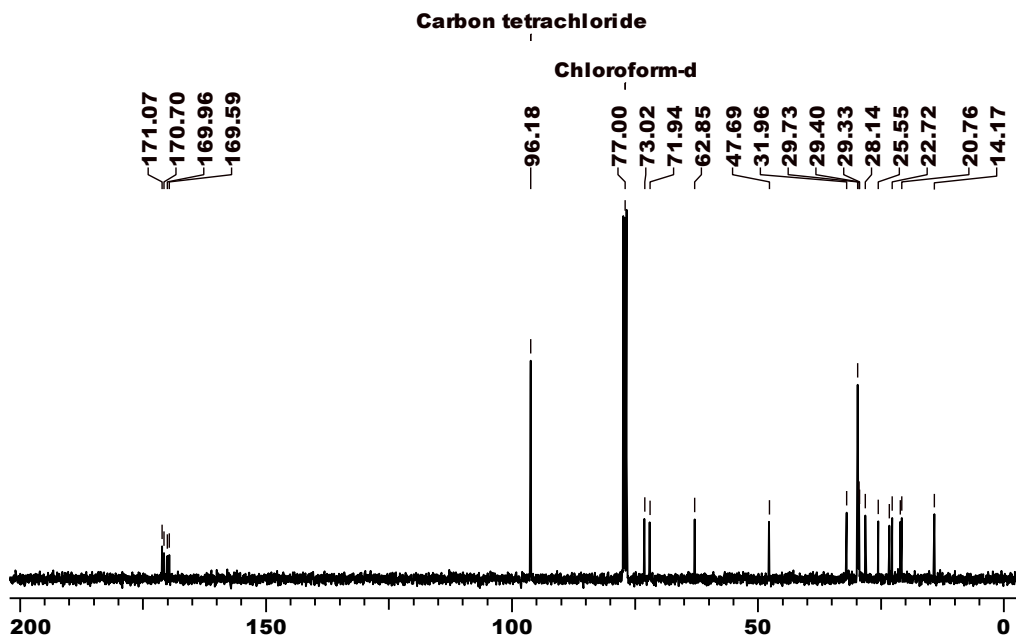

<sup>1</sup>H and <sup>13</sup>C NMR spectra of 7

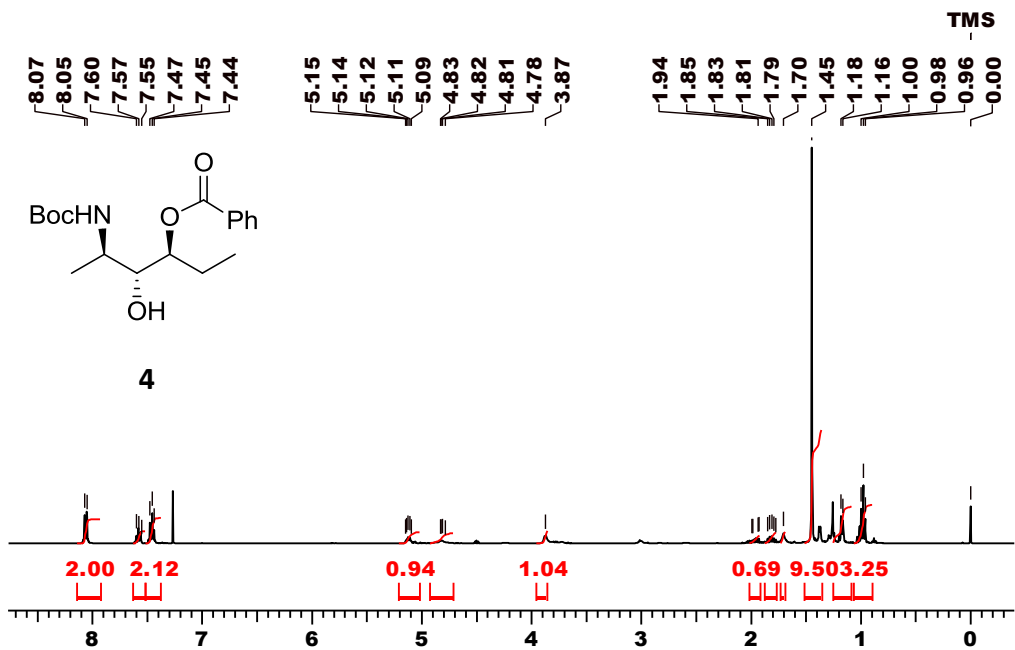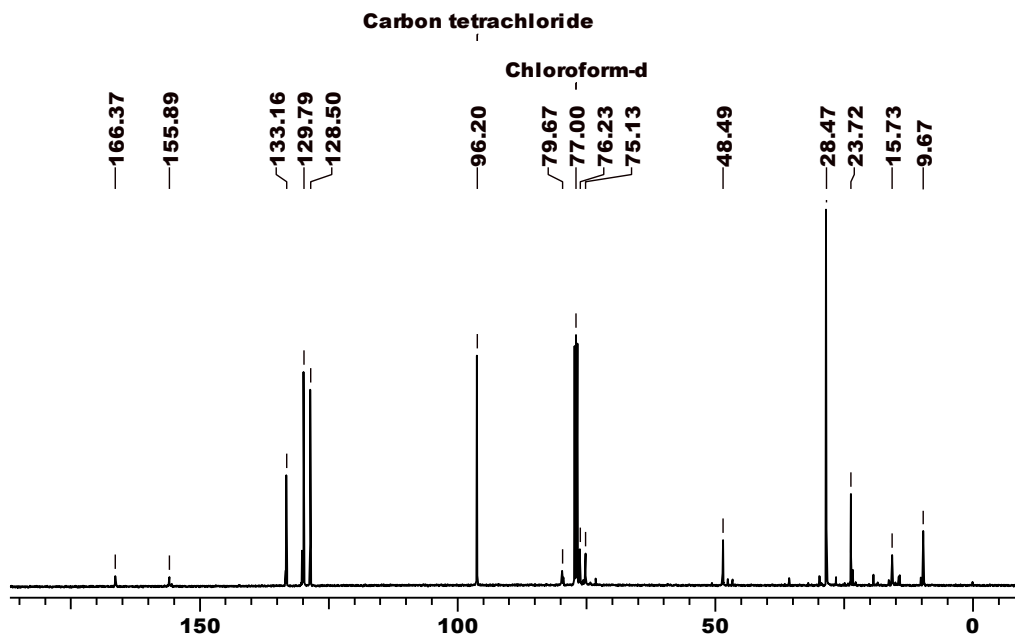

**$^1\text{H}$  and  $^{13}\text{C}$  NMR spectra of 4**

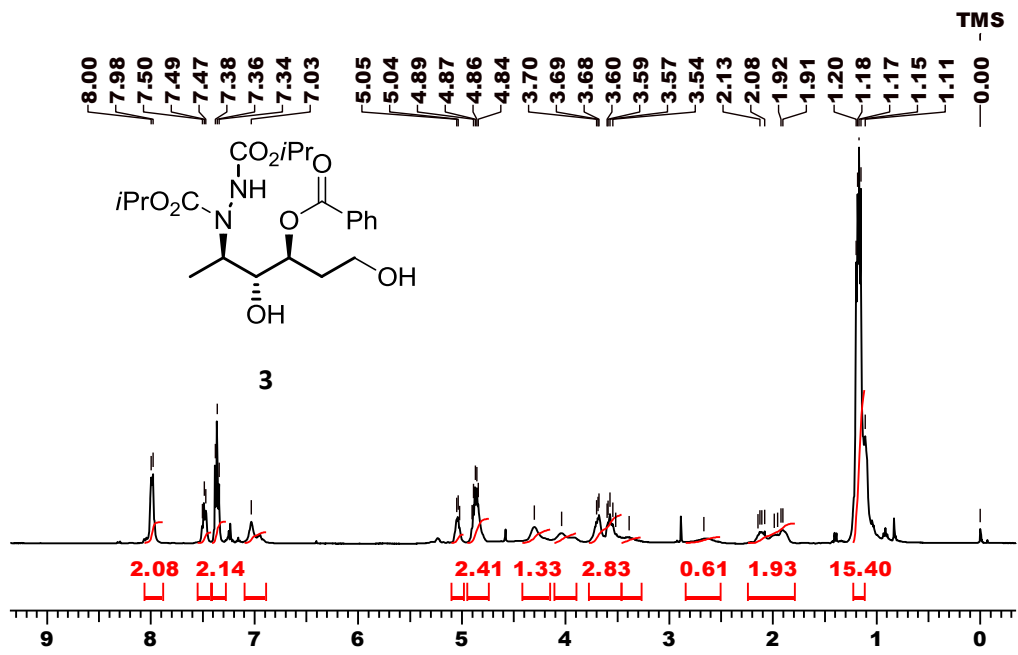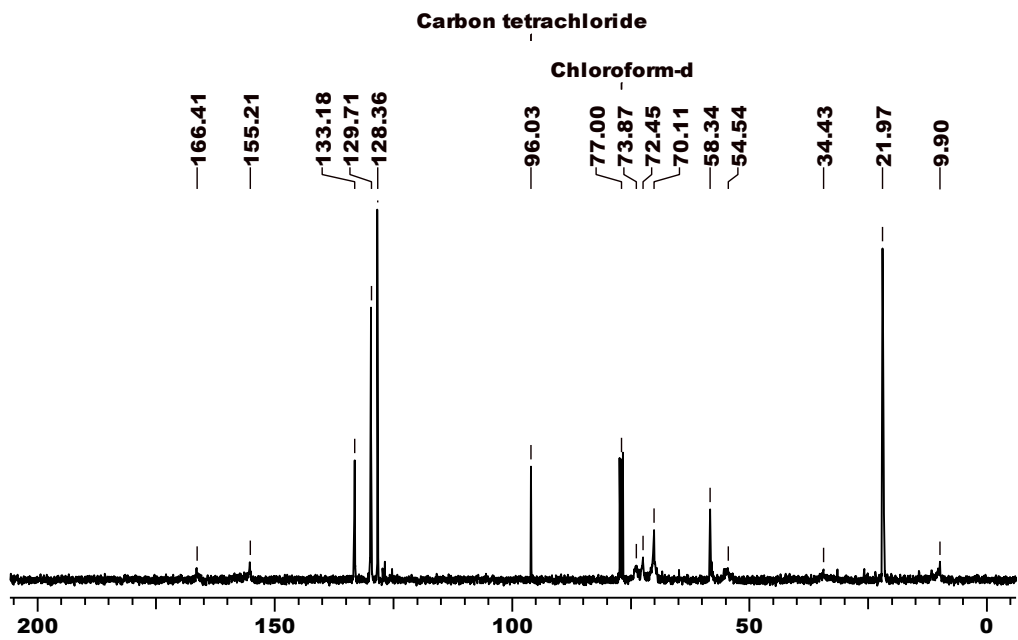

$^1\text{H}$  and  $^{13}\text{C}$  NMR spectra of **3**

## 2. HPLC DATA

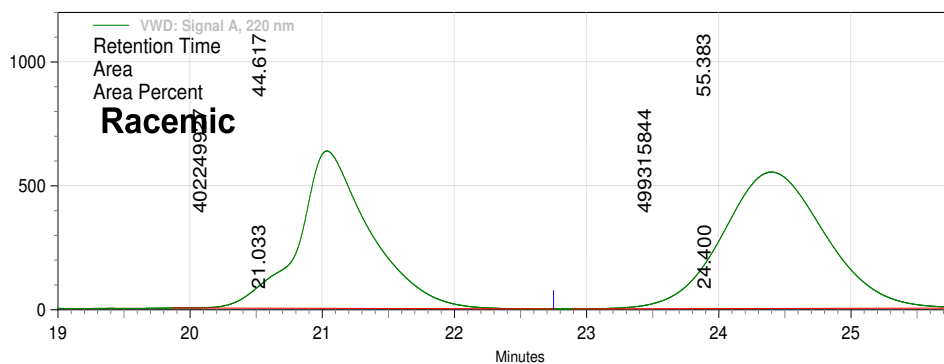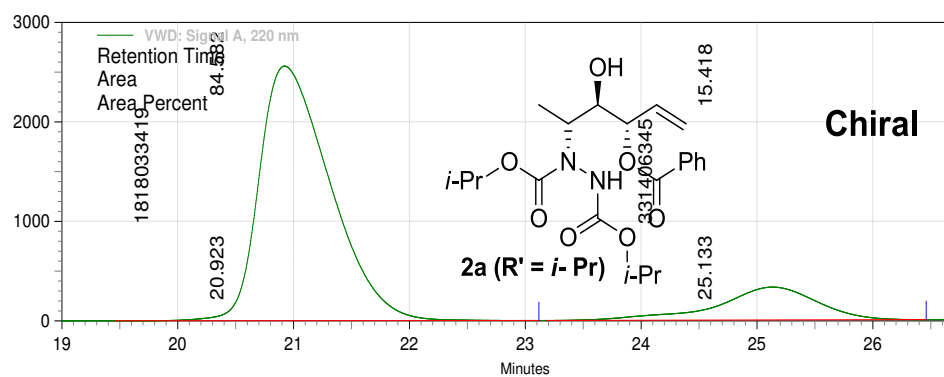

| <b>VWD: Signal A, 220 nm Results</b> |            |        |          |          |
|--------------------------------------|------------|--------|----------|----------|
| Retention Time                       | Area       | Area % | Height   | Height % |
| 20.923                               | 1818033419 | 84.58  | 42920581 | 88.57    |
| 25.133                               | 331406345  | 15.42  | 5539913  | 11.43    |
|                                      |            |        |          |          |
| <b>Totals</b>                        |            |        |          |          |
|                                      | 2149439764 | 100.00 | 48460494 | 100.00   |

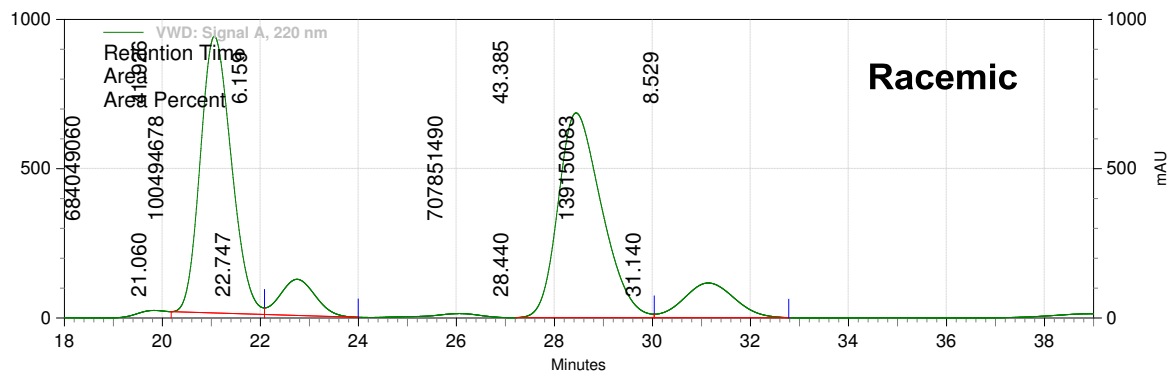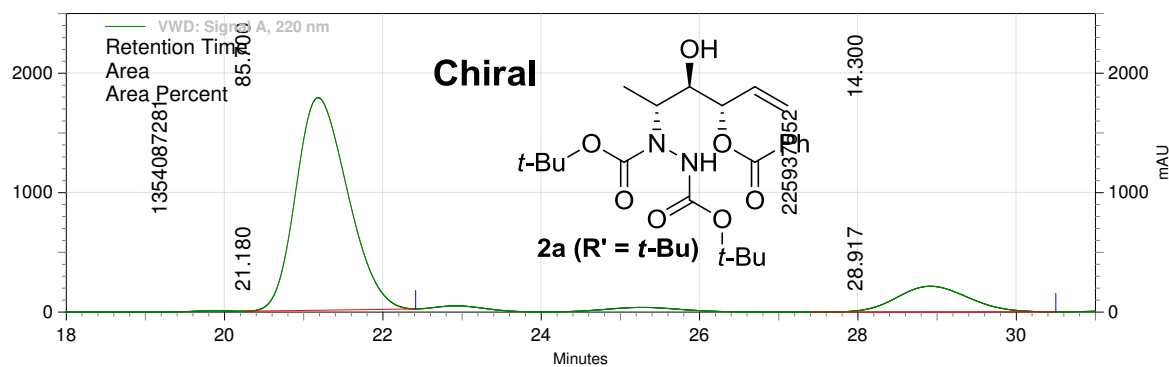

| <b>VWD: Signal A, 220 nm Results</b> |            |        |          |          |
|--------------------------------------|------------|--------|----------|----------|
| Retention Time                       | Area       | Area % | Height   | Height % |
| 21.180                               | 1354087281 | 85.70  | 29871545 | 89.24    |
| 28.917                               | 225937552  | 14.30  | 3603280  | 10.76    |
|                                      |            |        |          |          |
| Totals                               |            |        |          |          |
|                                      | 1580024833 | 100.00 | 33474825 | 100.00   |

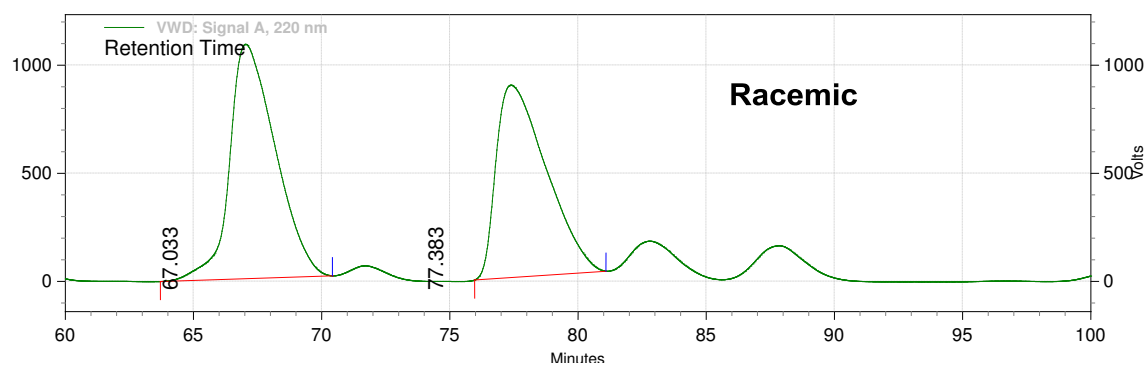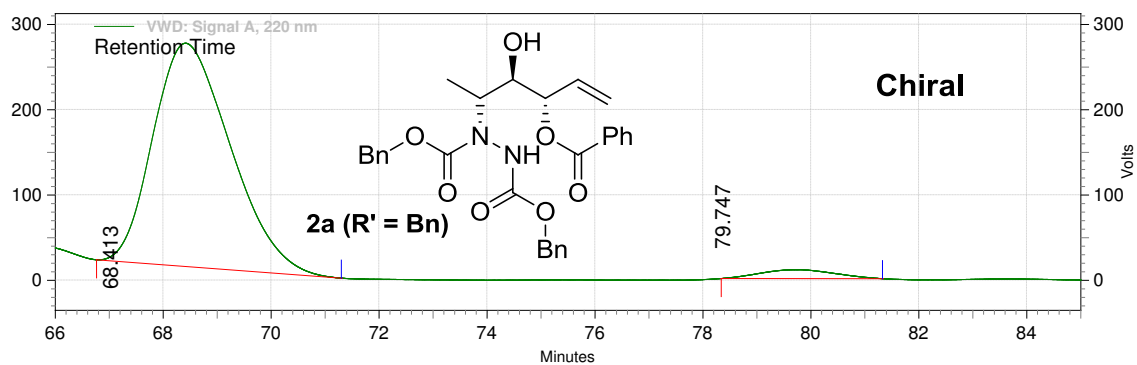

| <b>VWD: Signal A,<br/>220 nm Results</b> |           |        |         |          |
|------------------------------------------|-----------|--------|---------|----------|
| Retention Time                           | Area      | Area % | Height  | Height % |
| 68.413                                   | 437872111 | 96.34  | 4390683 | 96.19    |
| 79.747                                   | 16619017  | 3.66   | 174090  | 3.81     |
|                                          |           |        |         |          |
| Totals                                   |           |        |         |          |
|                                          | 454491128 | 100.00 | 4564773 | 100.00   |



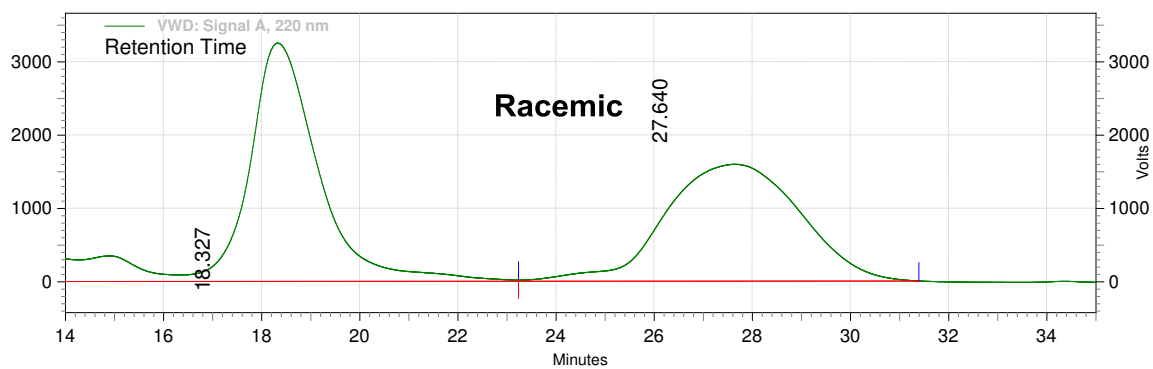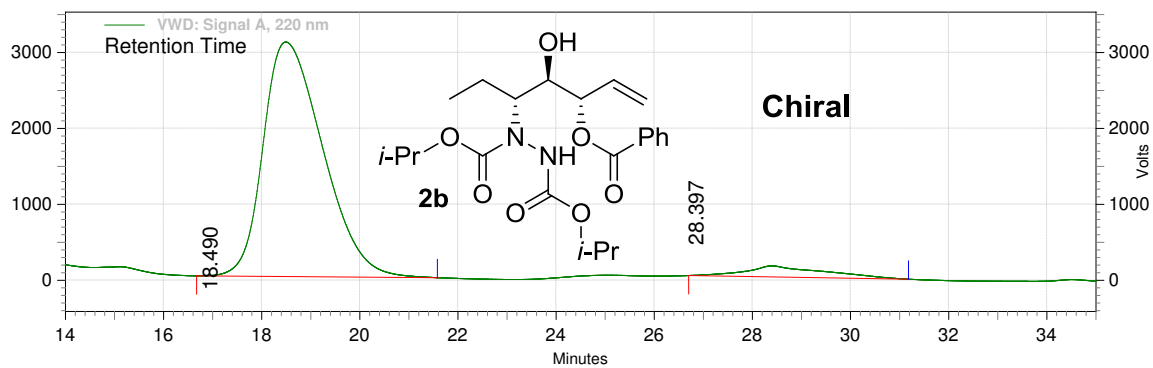

| VWD: Signal A, 220 nm Results |            |        |          |          |
|-------------------------------|------------|--------|----------|----------|
| Retention Time                | Area       | Area % | Height   | Height % |
| 18.490                        | 4377325612 | 94.10  | 51823051 | 95.50    |
| 28.397                        | 274385808  | 5.90   | 2439513  | 4.50     |
| Totals                        | 4651711420 | 100.00 | 54262564 | 100.00   |

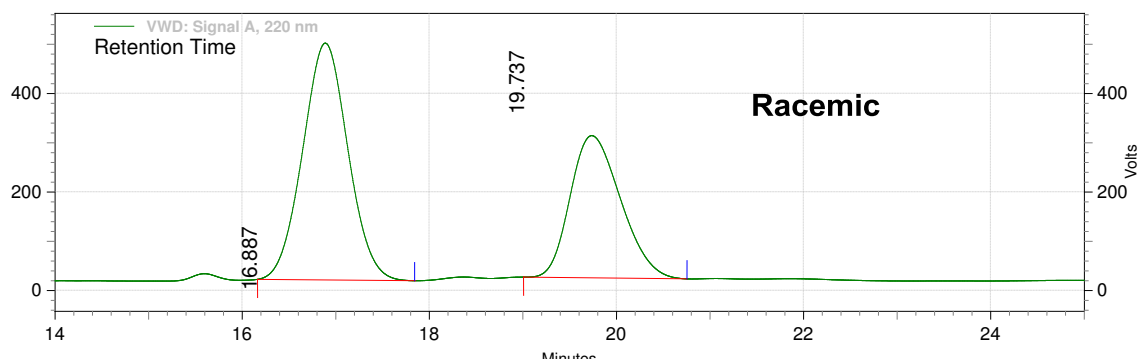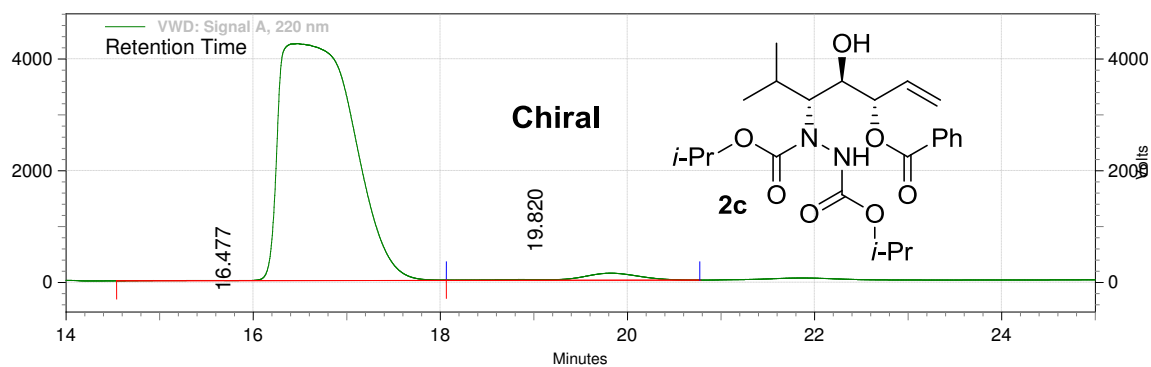

| <b>VWD: Signal A, 220 nm Results</b> |            |        |          |          |
|--------------------------------------|------------|--------|----------|----------|
| Retention Time                       | Area       | Area % | Height   | Height % |
| 16.477                               | 3927814458 | 97.64  | 71167789 | 97.12    |
| 19.820                               | 94731861   | 2.36   | 2108664  | 2.88     |
| <b>Totals</b>                        |            |        |          |          |
|                                      | 4022546319 | 100.00 | 73276453 | 100.00   |

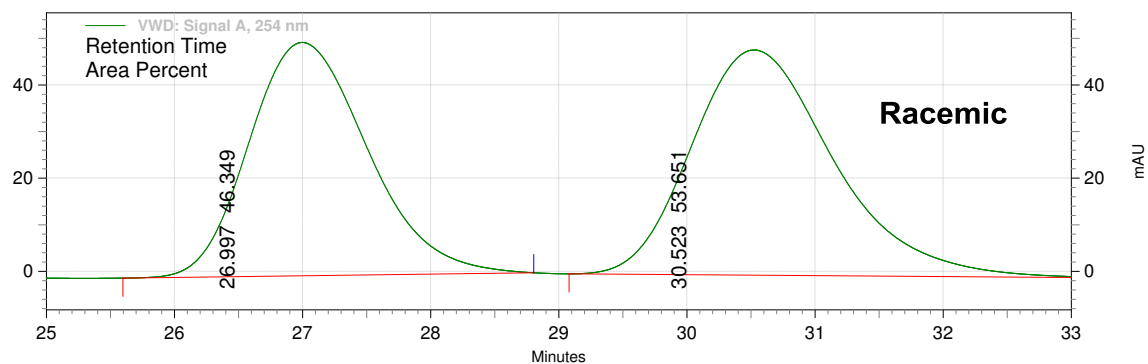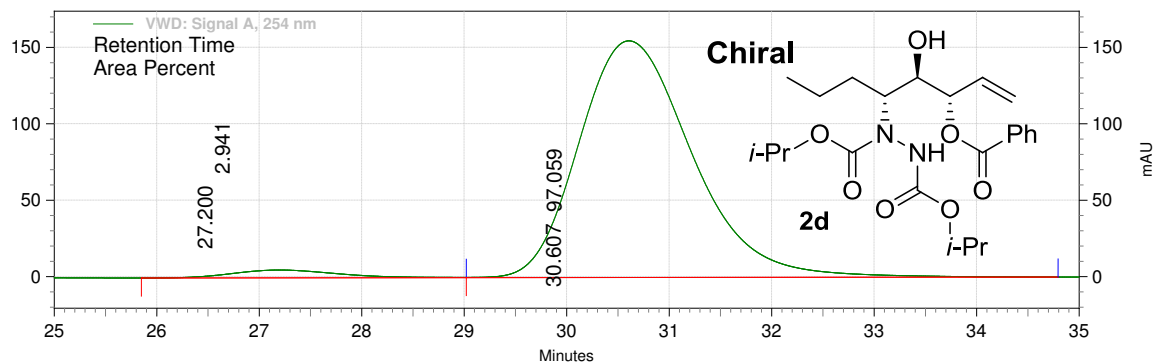

| <b>VWD: Signal A, 254 nm Results</b> |           |        |         |          |
|--------------------------------------|-----------|--------|---------|----------|
| Retention Time                       | Area      | Area % | Height  | Height % |
| 27.200                               | 6026001   | 2.94   | 85701   | 3.19     |
| 30.607                               | 198857225 | 97.06  | 2598245 | 96.81    |
|                                      |           |        |         |          |
| <b>Totals</b>                        |           |        |         |          |
|                                      | 204883226 | 100.00 | 2683946 | 100.00   |

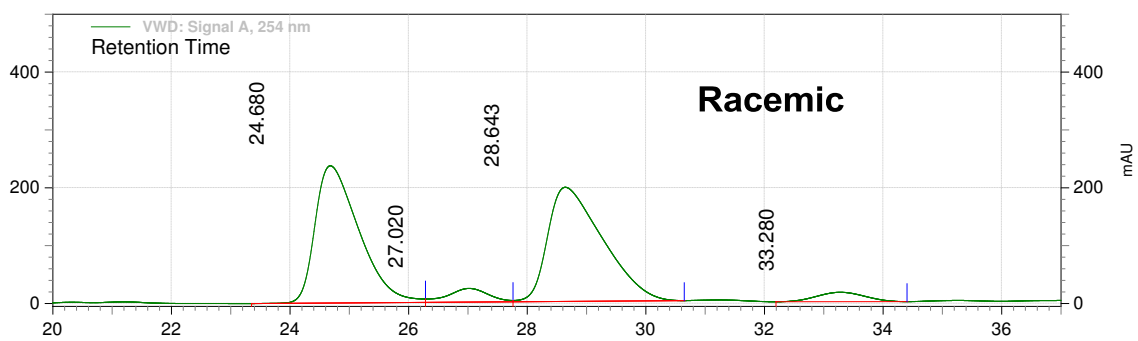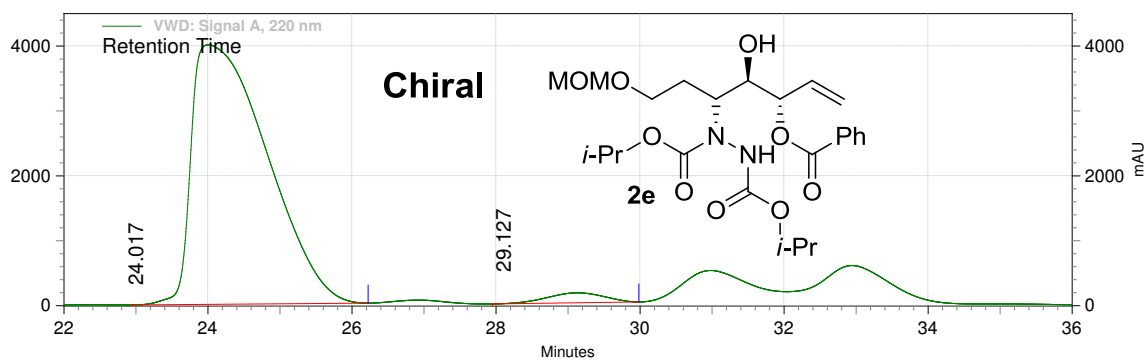

| <b>VWD: Signal A, 220 nm Results</b> |            |        |          |          |
|--------------------------------------|------------|--------|----------|----------|
| Retention Time                       | Area       | Area % | Height   | Height % |
| 24.017                               | 4883290118 | 97.22  | 67088890 | 96.30    |
| 29.127                               | 139847311  | 2.78   | 2575790  | 3.70     |
| <b>Totals</b>                        |            |        |          |          |
|                                      | 5023137429 | 100.00 | 69664680 | 100.00   |

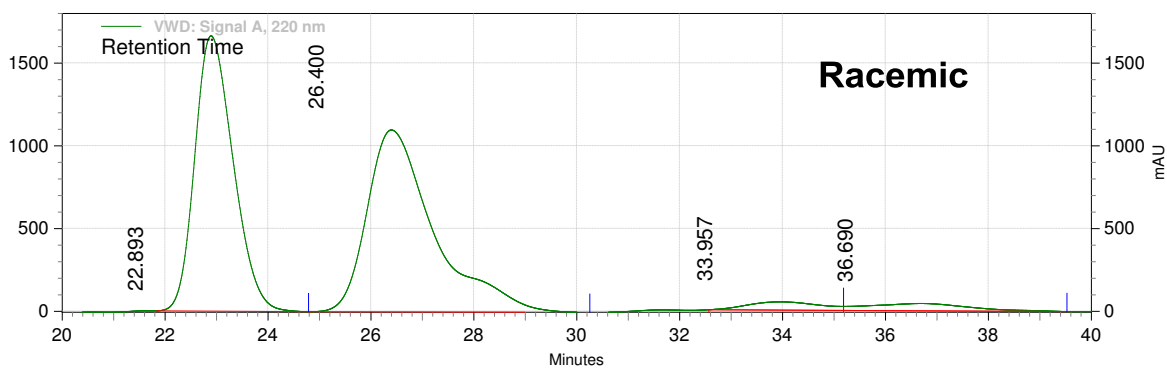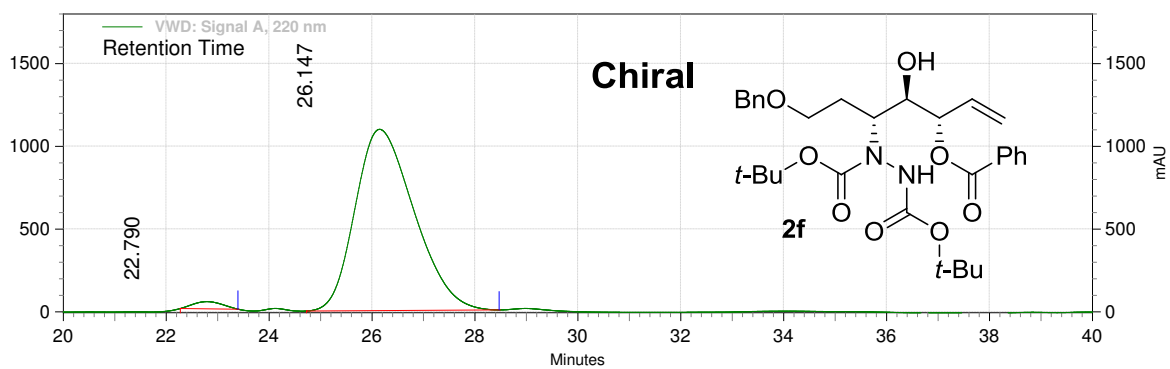

| <b>VWD: Signal A, 220 nm Results</b> |            |        |          |          |
|--------------------------------------|------------|--------|----------|----------|
| Retention Time                       | Area       | Area % | Height   | Height % |
| 22.790                               | 28750037   | 1.93   | 730956   | 3.83     |
| 26.147                               | 1461277993 | 98.07  | 18374212 | 96.17    |
|                                      |            |        |          |          |
| Totals                               |            |        |          |          |
|                                      | 1490028030 | 100.00 | 19105168 | 100.00   |

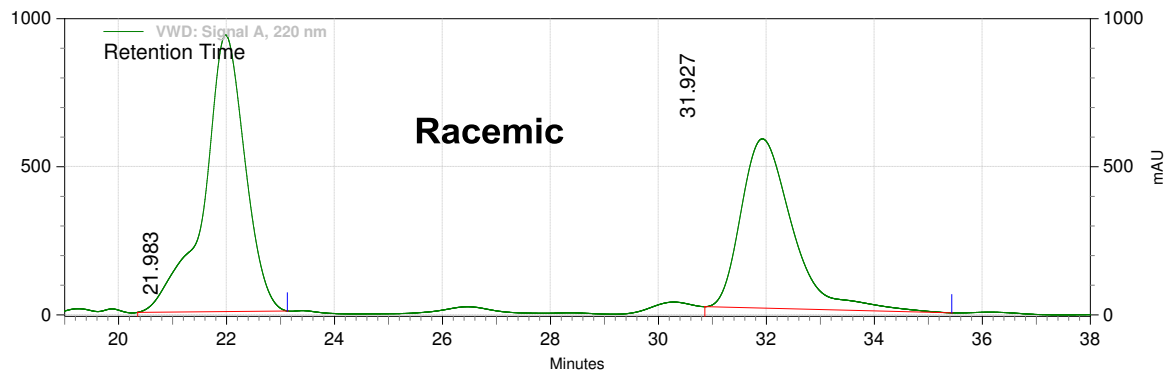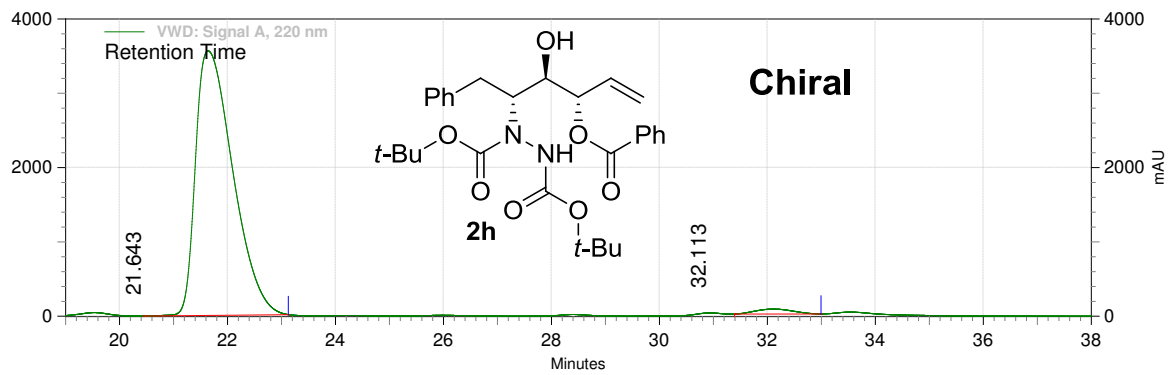

| <b>VWD: Signal A, 220 nm Results</b> |            |        |          |          |
|--------------------------------------|------------|--------|----------|----------|
| Retention Time                       | Area       | Area % | Height   | Height % |
| 21.643                               | 2864322578 | 98.15  | 59702583 | 98.17    |
| 32.113                               | 53898977   | 1.85   | 1115457  | 1.83     |
|                                      |            |        |          |          |
| Totals                               |            |        |          |          |
|                                      | 2918221555 | 100.00 | 60818040 | 100.00   |

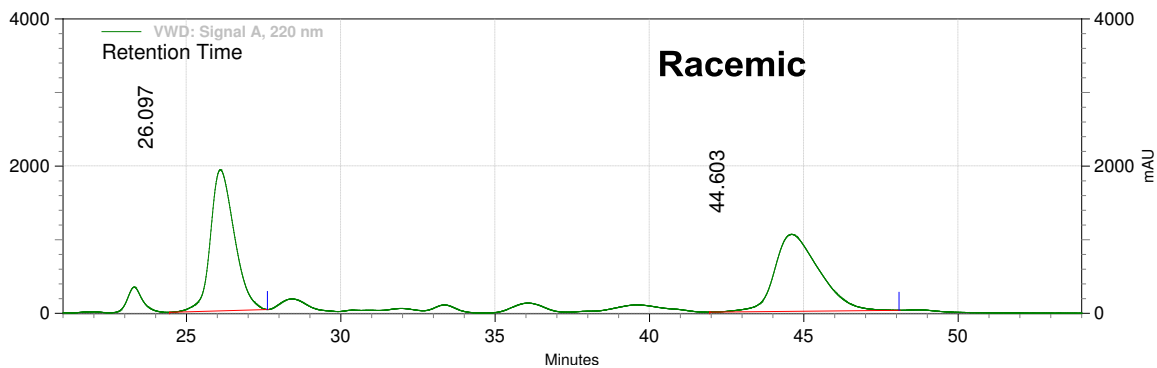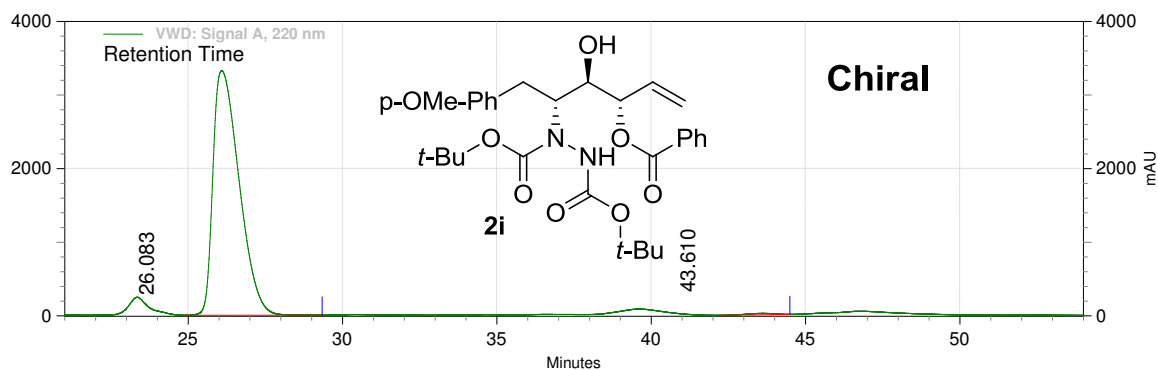

| <b>VWD: Signal A, 220 nm Results</b> |            |        |          |          |
|--------------------------------------|------------|--------|----------|----------|
| Retention Time                       | Area       | Area % | Height   | Height % |
| 26.083                               | 3280795998 | 99.43  | 55728819 | 99.46    |
| 43.610                               | 18850571   | 0.57   | 303442   | 0.54     |
| Totals                               |            |        |          |          |
|                                      | 3299646569 | 100.00 | 56032261 | 100.00   |

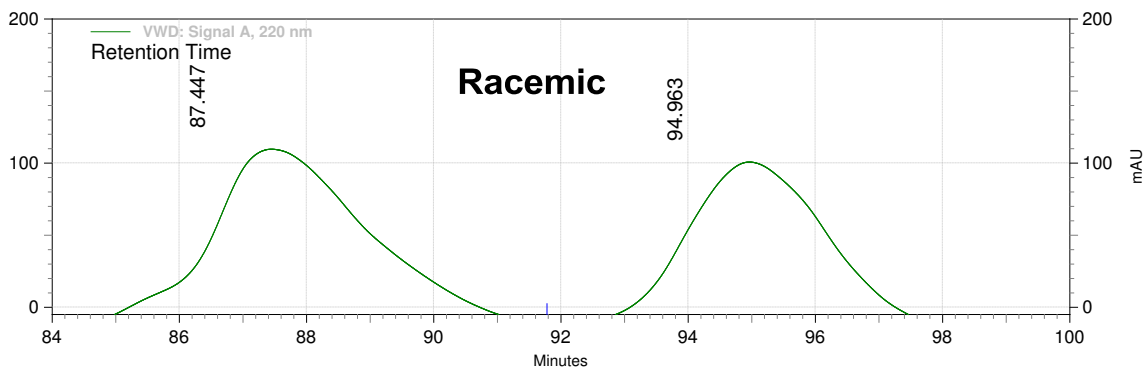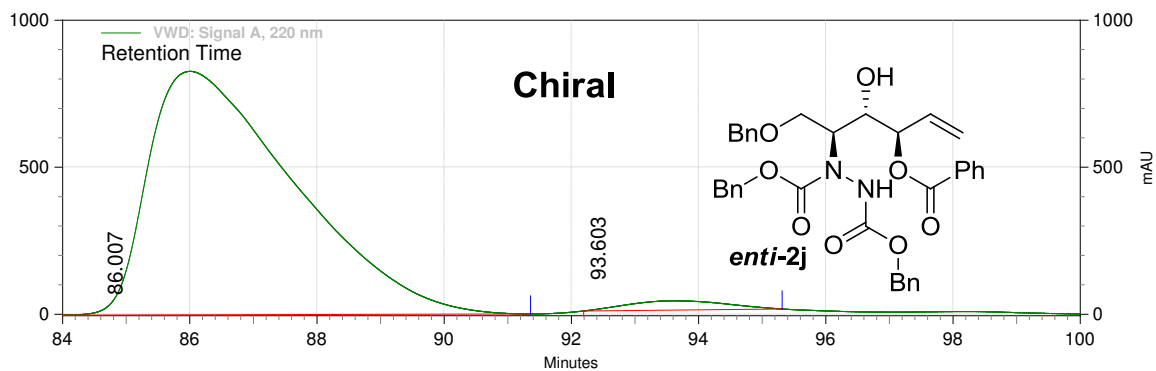

| <b>VWD: Signal A, 220 nm Results</b> |            |        |          |          |
|--------------------------------------|------------|--------|----------|----------|
| Retention Time                       | Area       | Area % | Height   | Height % |
| 86.007                               | 2207902336 | 97.49  | 13887984 | 96.34    |
| 93.603                               | 56955538   | 2.51   | 527171   | 3.66     |
|                                      |            |        |          |          |
| Totals                               |            |        |          |          |
|                                      | 2264857874 | 100.00 | 14415155 | 100.00   |



### 3. HRMS Data

NM-3 #896 RT: 3.99 AV: 1 NL: 9.10E8  
T: FTMS + p ESI Full ms [60.00-900.00]

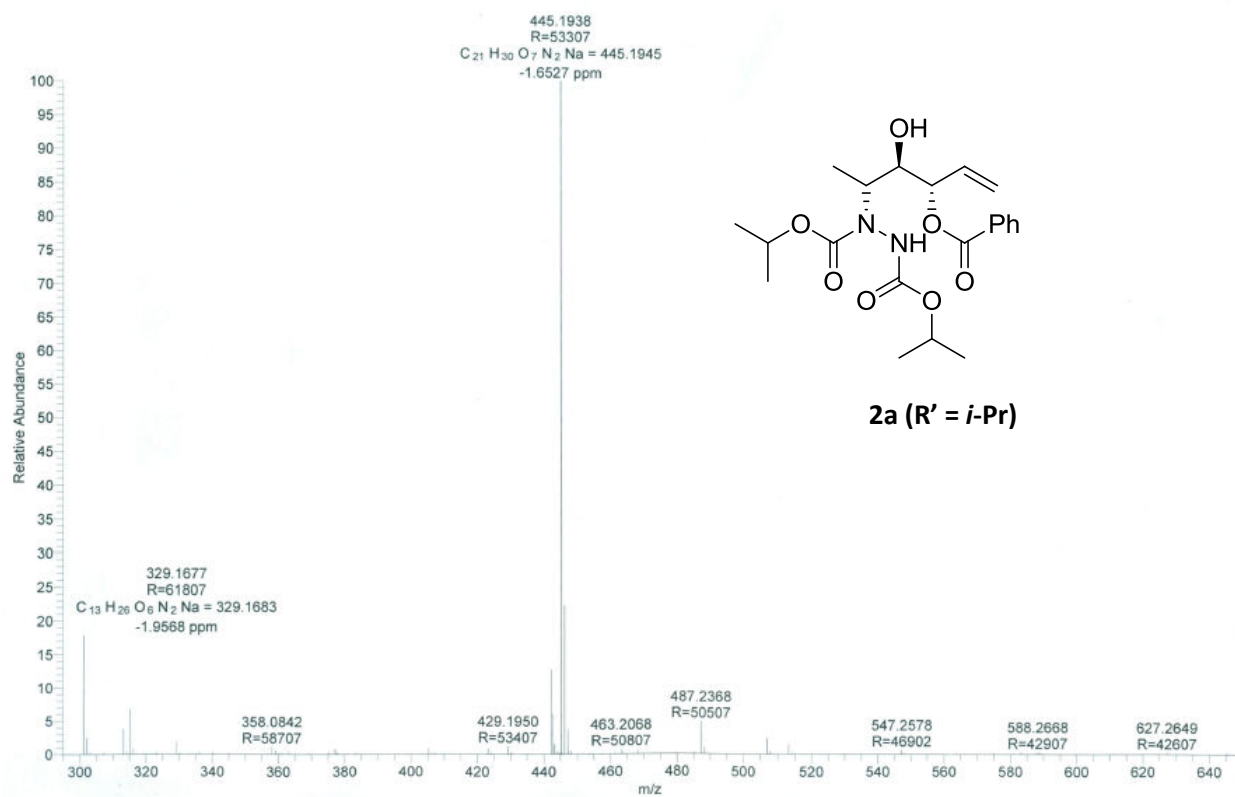

BN 5 129 (2.375) AM2 (Ar,20000,0.556,28,0.00,LS 3); ABS; Sm (SG, 1x1.00); Cm (126.131)

1: TOF MS ES+  
3.04e5

CALCULATED MASS  
(M+Na)+ 473.2263

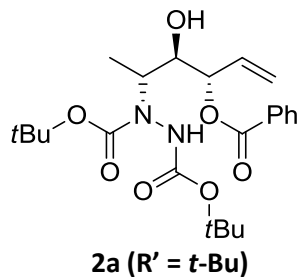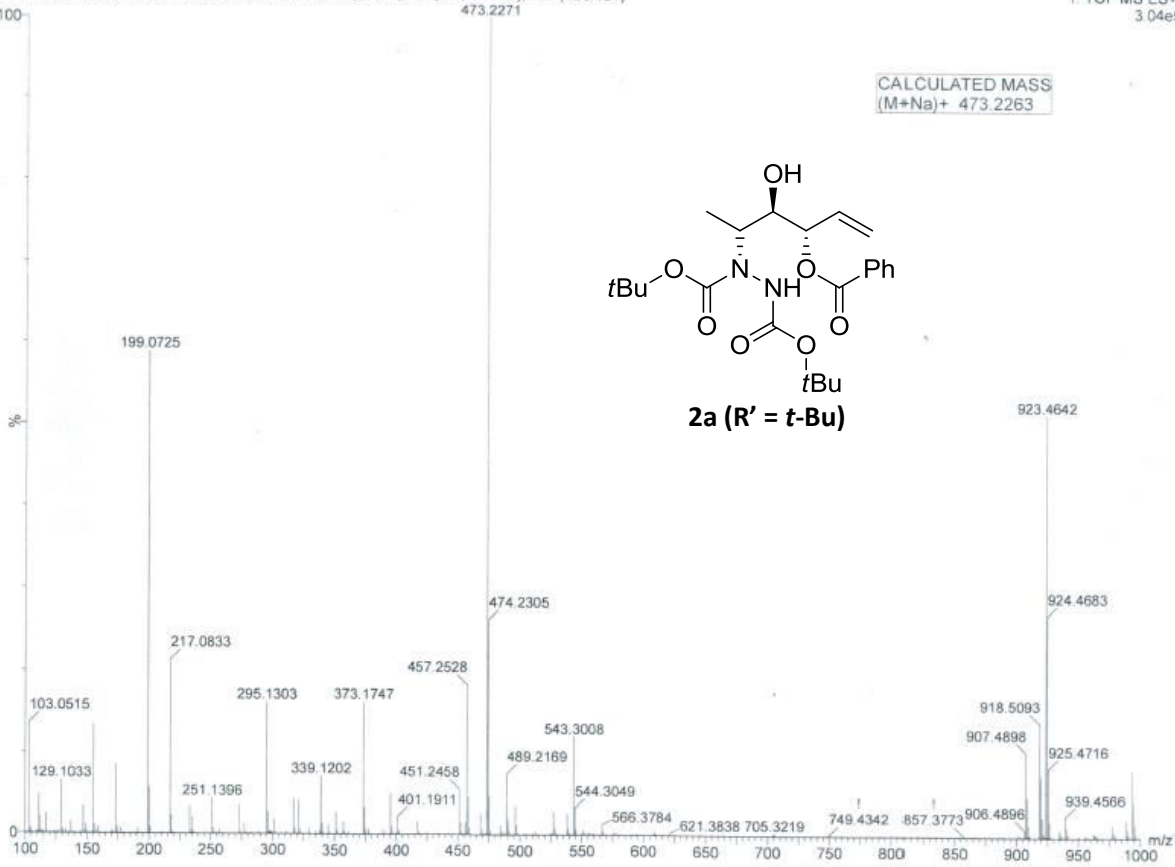

BN 4 126 (2.304) AM2 (Ar,20000.0,556.28,0.00,LS 3), ABS; Sm (SG, 1x1.00); Cm (125-126)

1: TOF MS ES+  
9.74e4

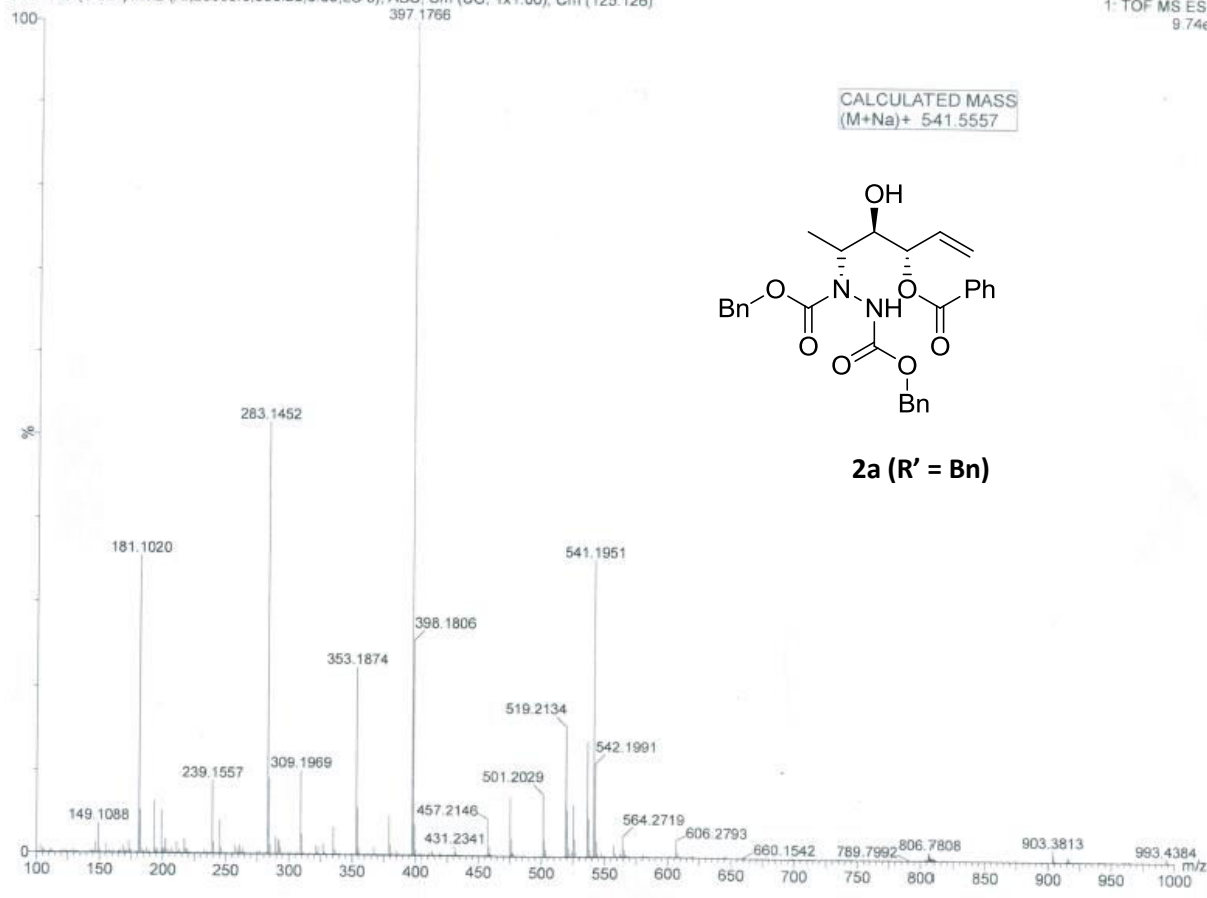

CALCULATED MASS  
(M+Na)+ 541.5557

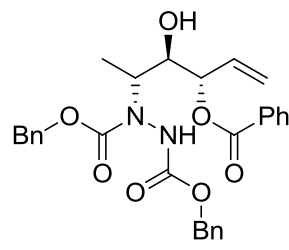

2a (R' = Bn)

NM-6 107 (1.960) AM2 (Ar,20000,0.556,28,0.00,LS 1); Sm (SG, 1x1.00); Cm (106.109)  
459.2091

1: TOF MS ES+  
2.01e5

CALCULATED MASS  
(M+Na)+ 459.2107

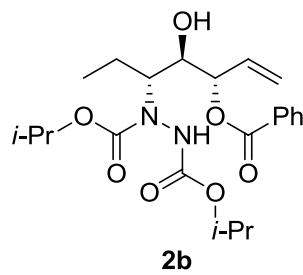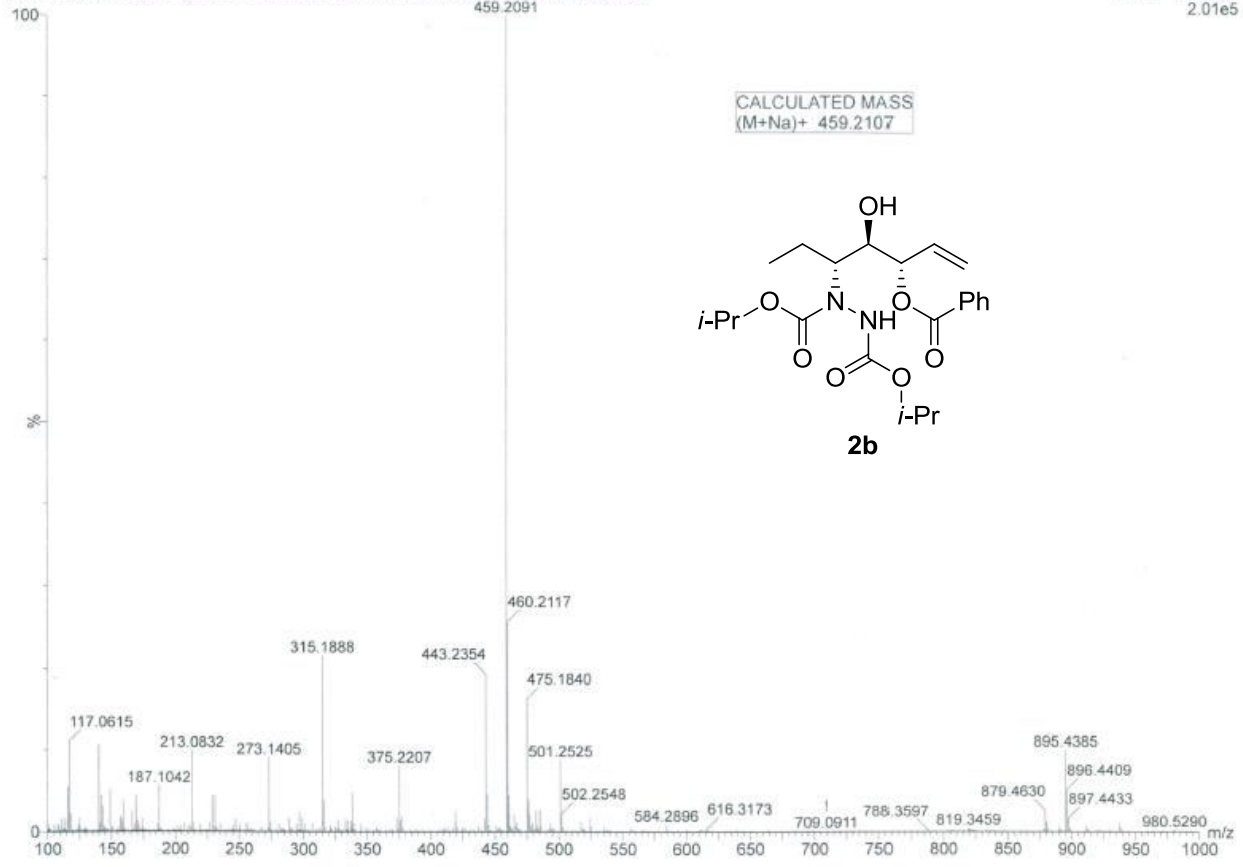

NM-5 123 (2.253) AM2 (Ar,20000.0,556.28,0.00,LS 1); Sm (SG, 1x1.00); Cm (121:125)  
473.2253

1: TOF MS ES+  
5.81e5

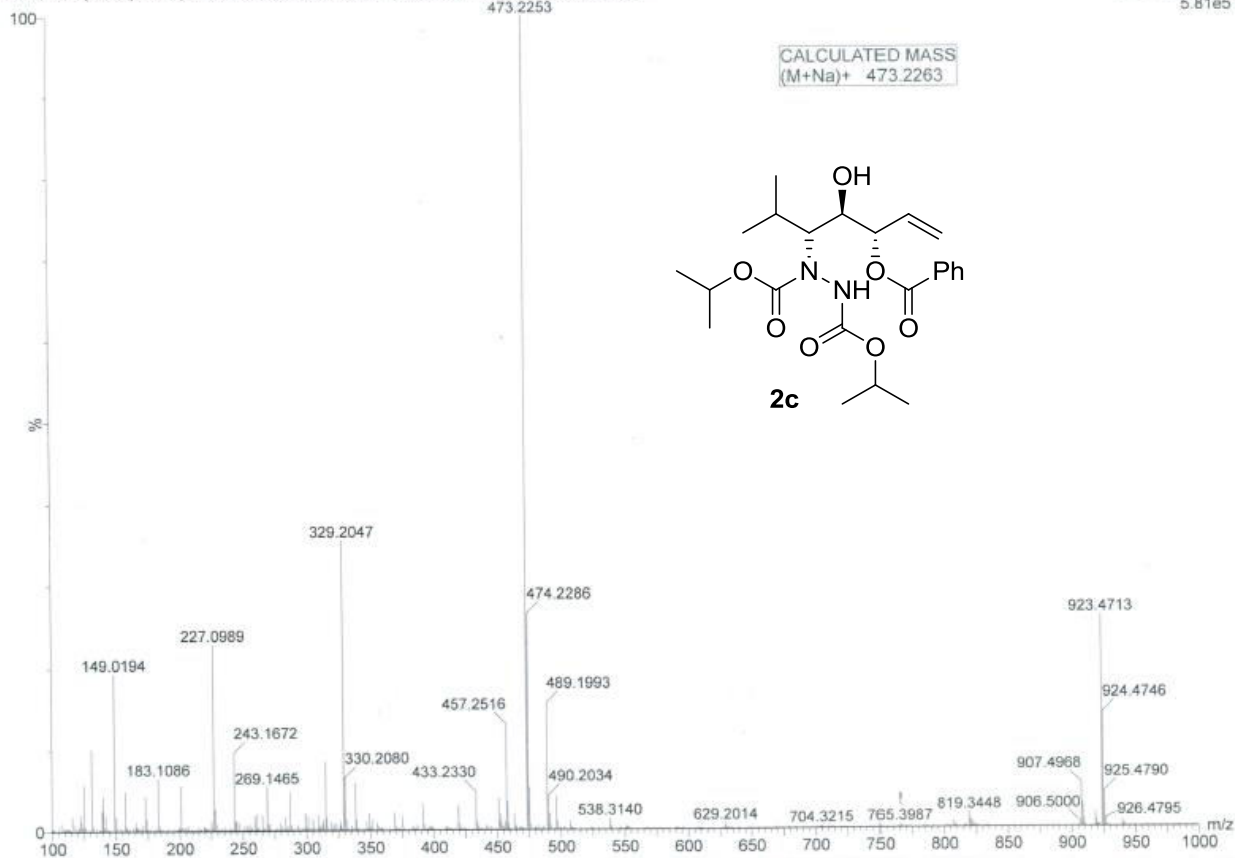

CALCULATED MASS  
(M+Na)+ 473.2263

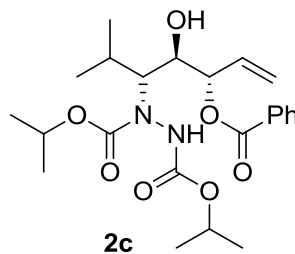

NM-5 #925 RT: 4.12 AV: 1 NL: 4.51E8  
T: FTMS + p ESI Full ms [60.00-900.00]

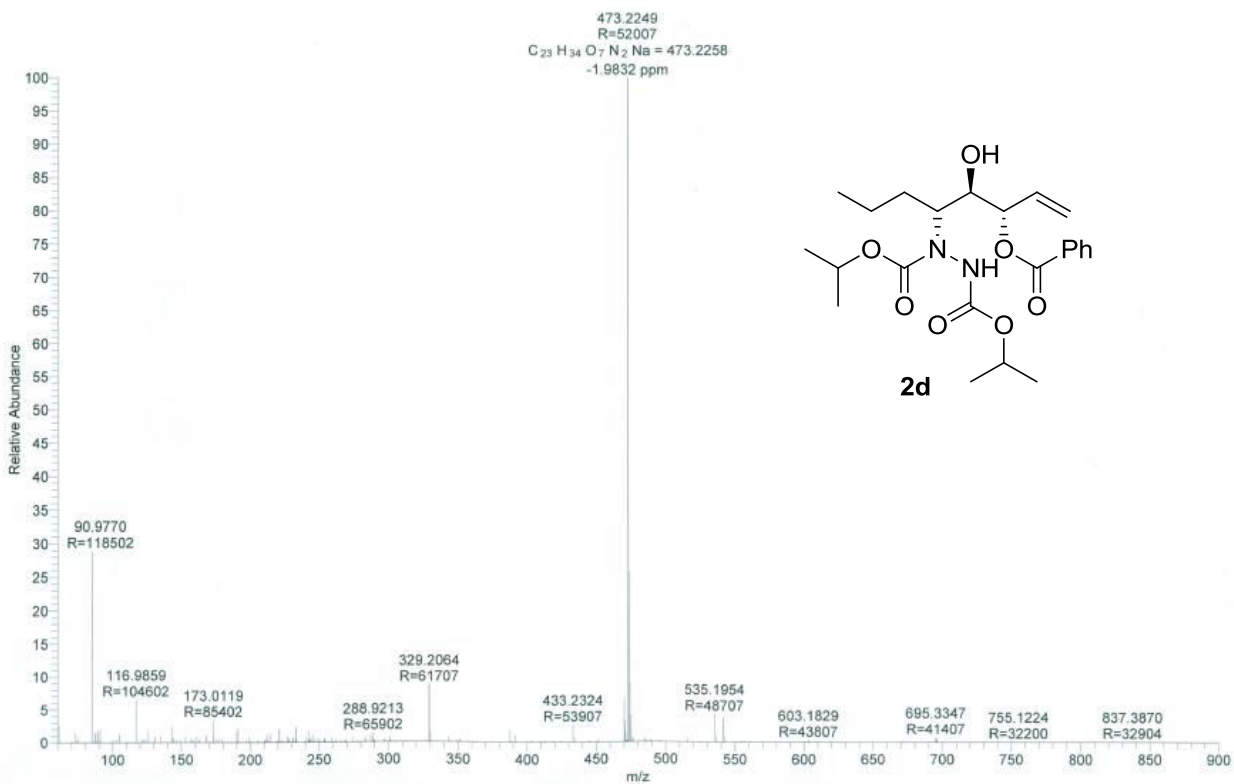

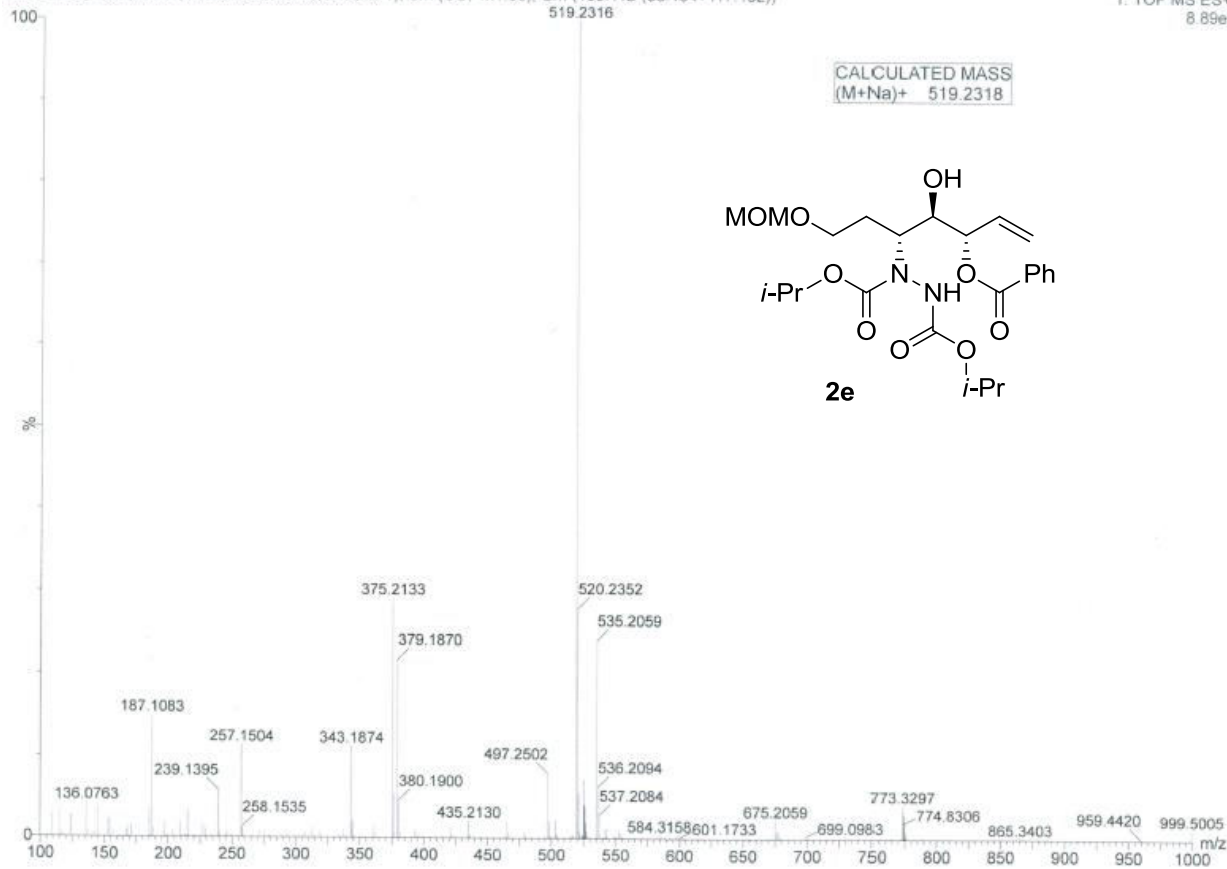

NM-1-R 147 (2.702) AM2 (Ar,20000.0,556.28,0.00,LS 1); Sm (SG, 1x1.00)

1: TOF MS ES+  
1.86e5

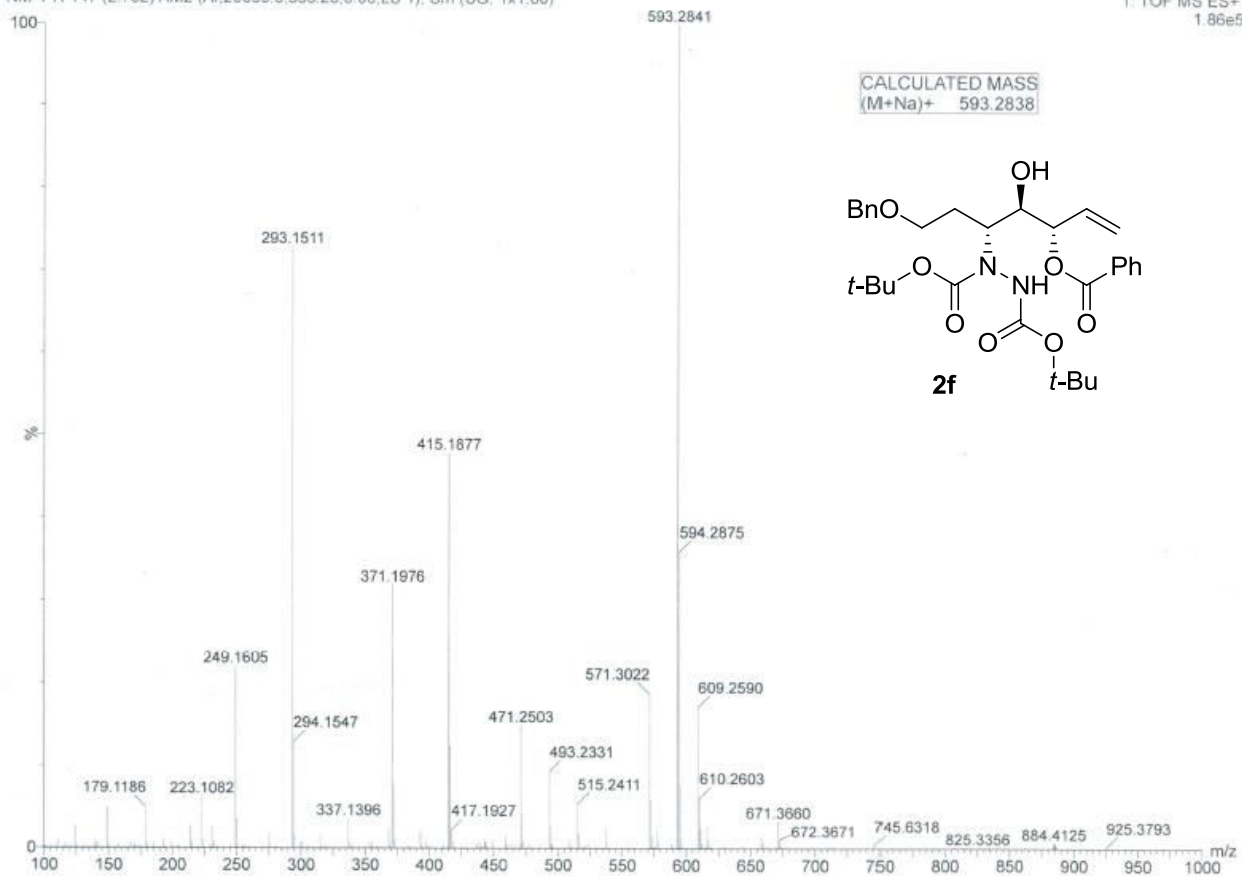

CALCULATED MASS  
(M+Na)<sup>+</sup> 593.2838

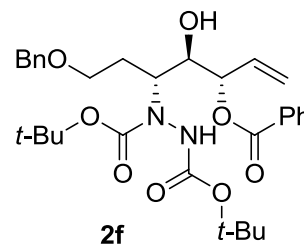



NM-4 124 (2.270) AM2 (Ar,20000,0,556.28,0.00,LS 1); Sm (SG, 1x1.00)

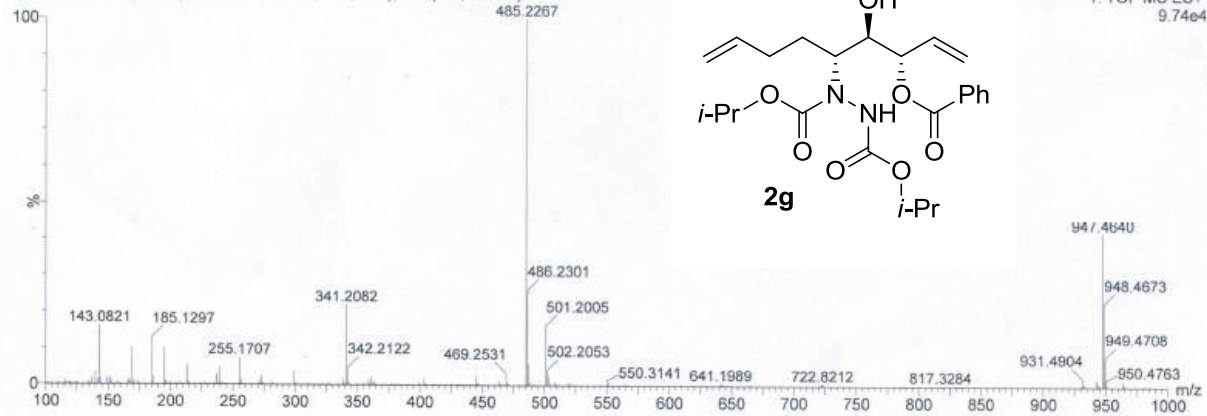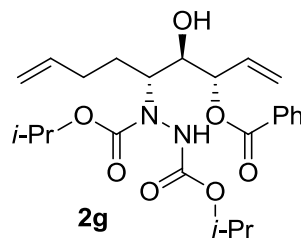

1: TOF MS ES+  
9.74e4

VSK NM3 139 (2.545) AM2 (Ar,20000.0,556.28,0.00,LS 1); Sm (SG, 1x1.00)

1: TOF MS ES+  
9.83e5

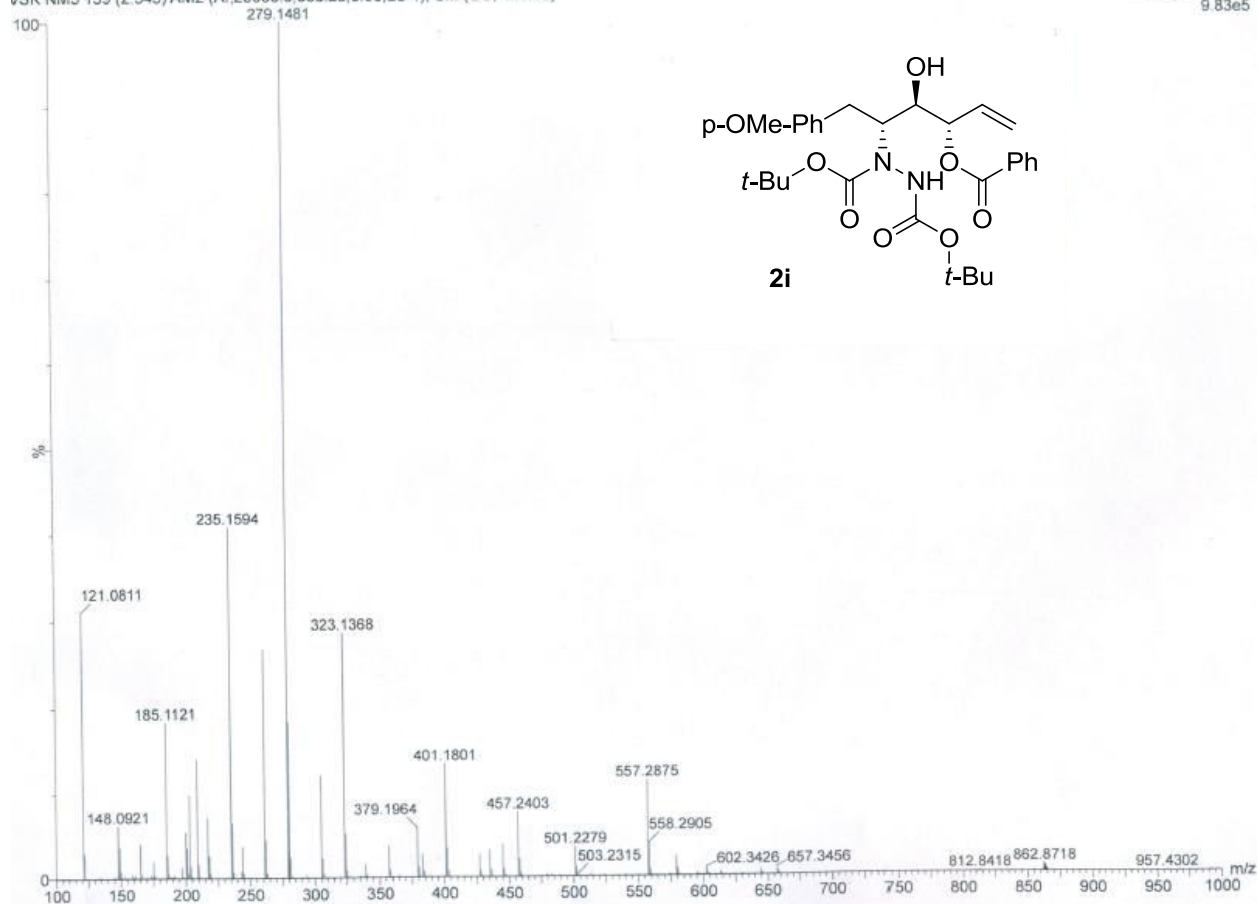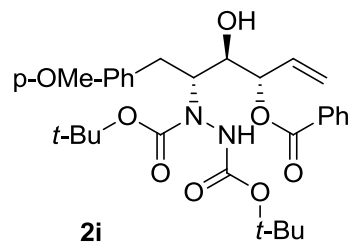

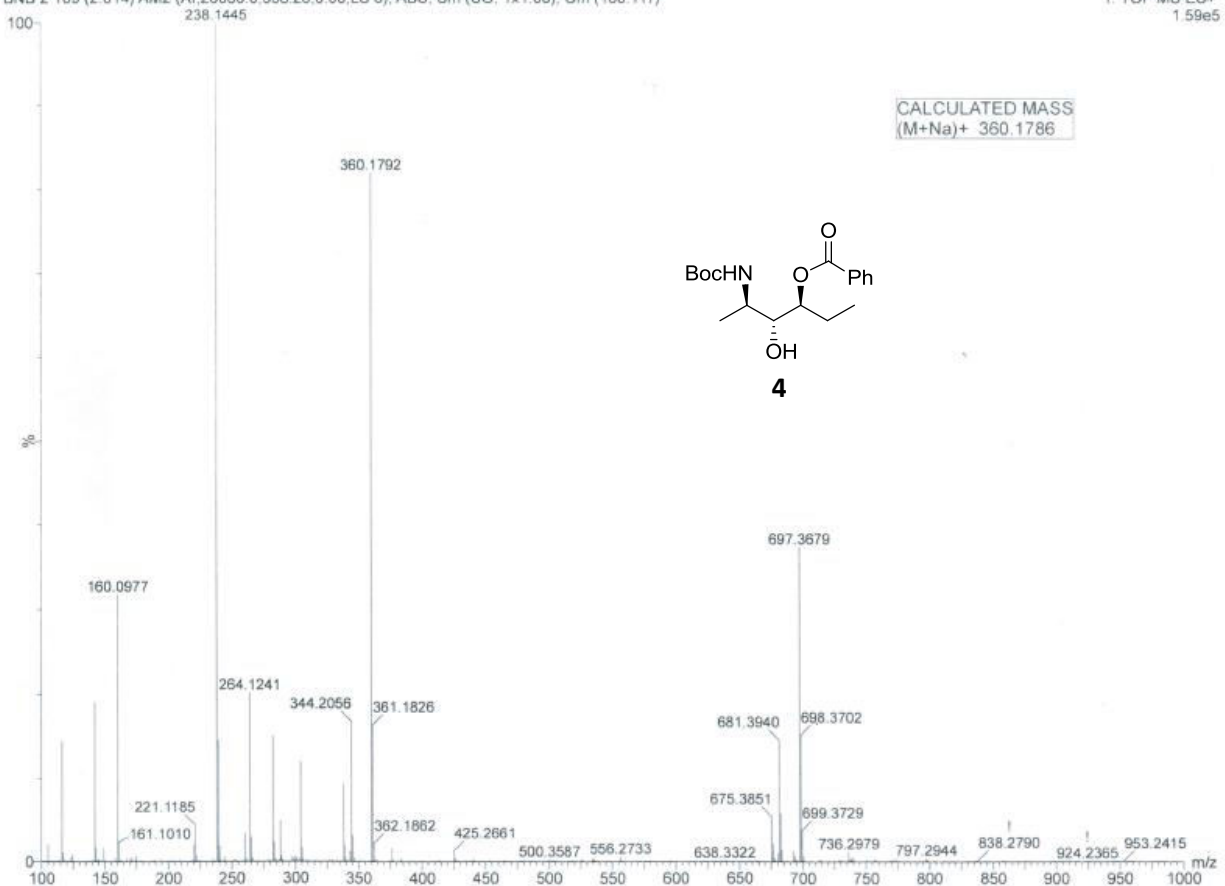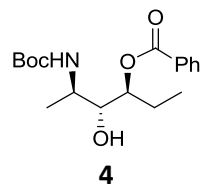

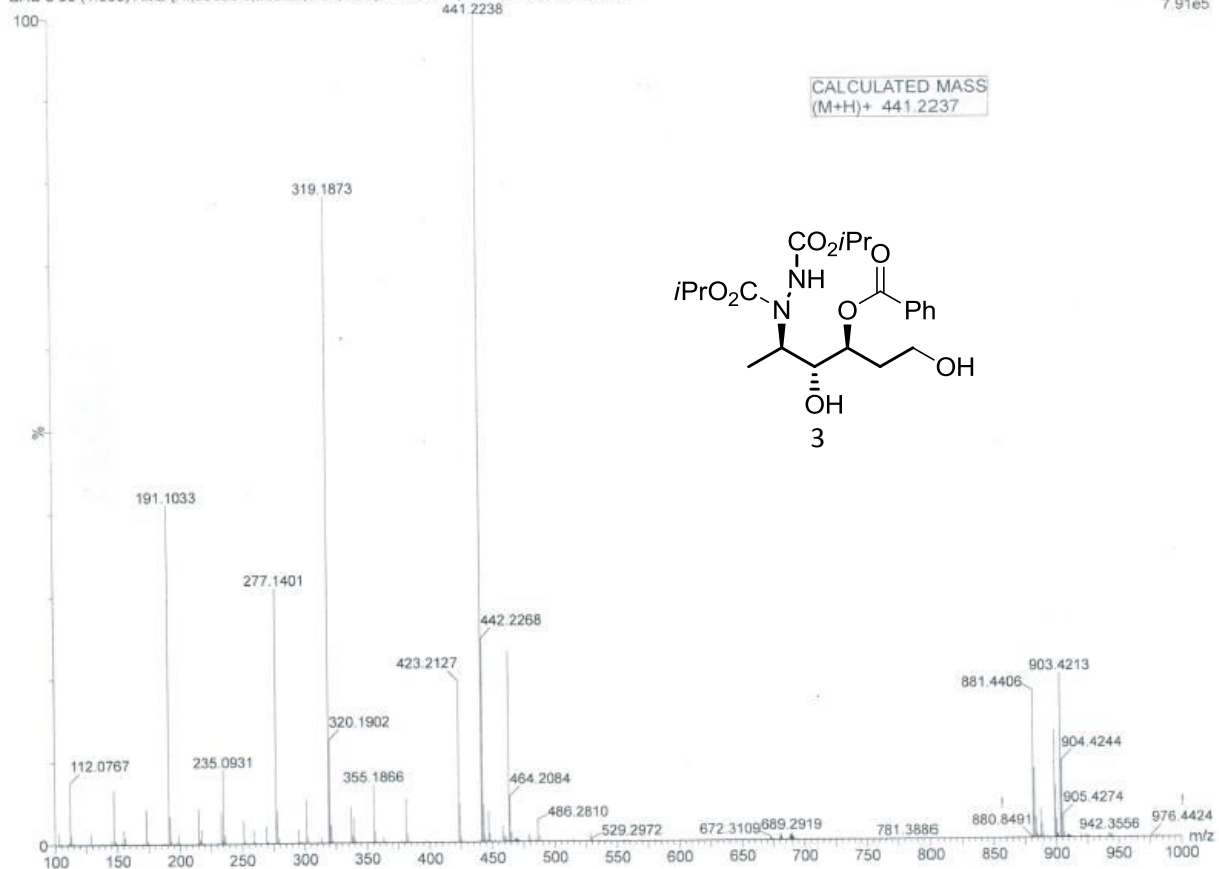

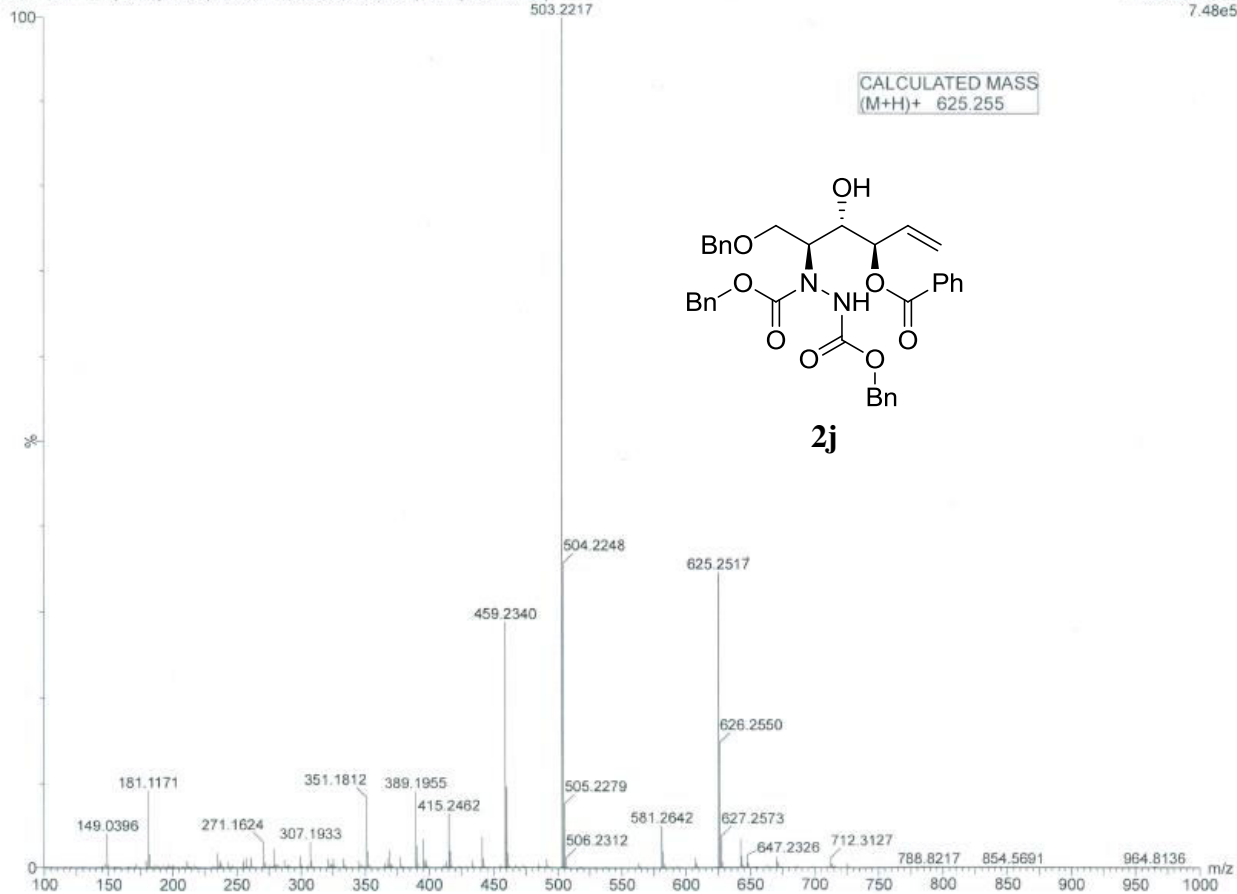

VSK NM2 97 (1.789) AM2 (Ar,20000.0,556.28,0.00,LS 1); Sm (SG, 1x1.00)

1: TOF MS ES+  
6.72e5

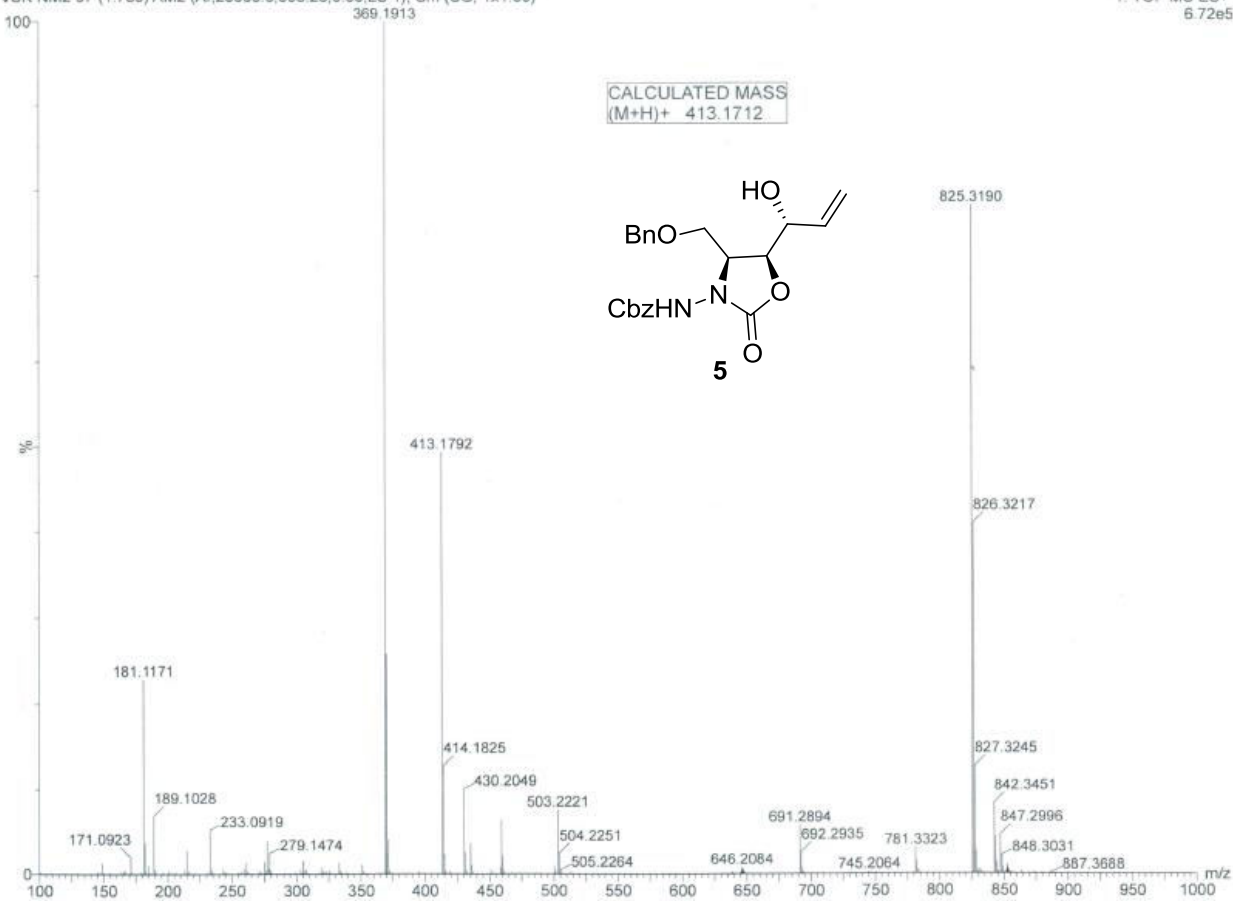

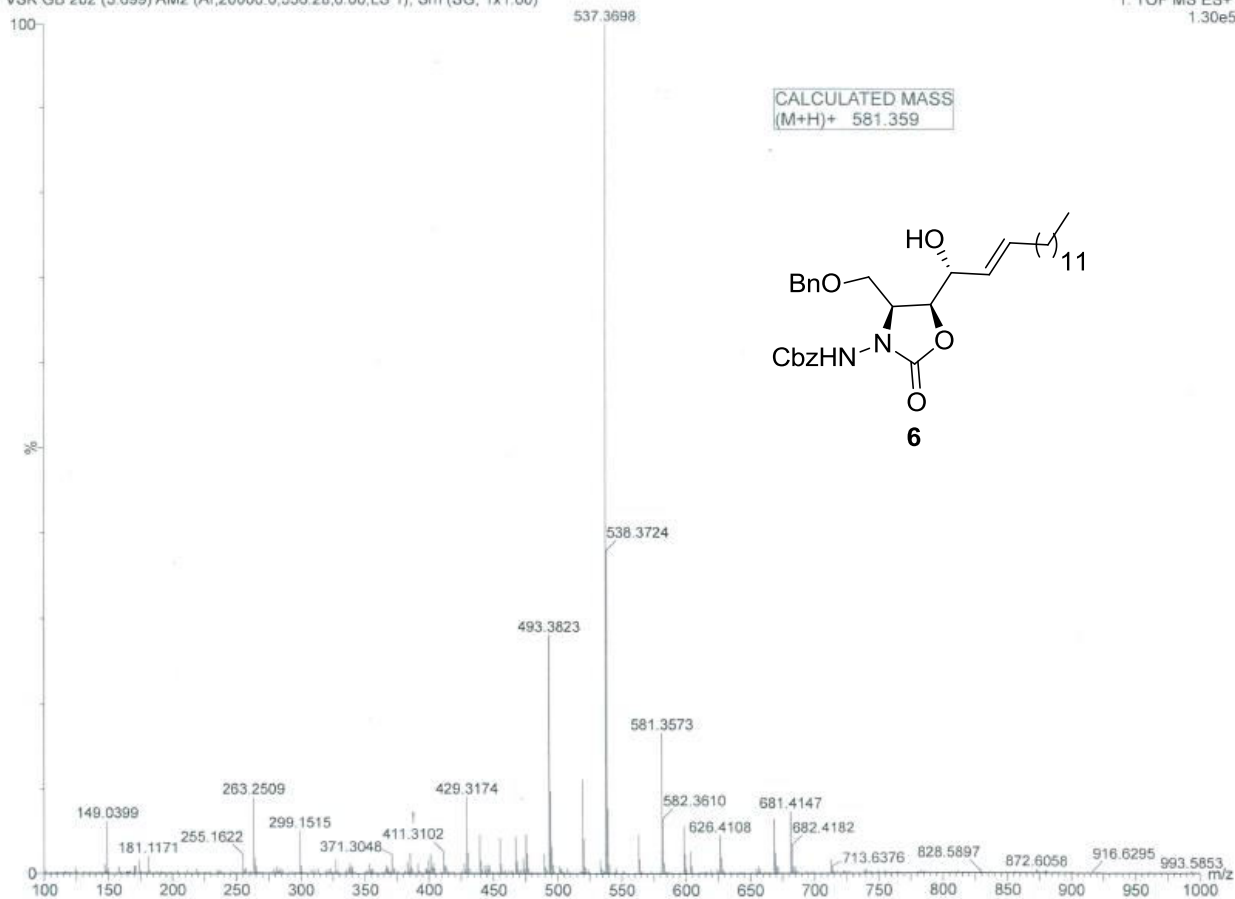

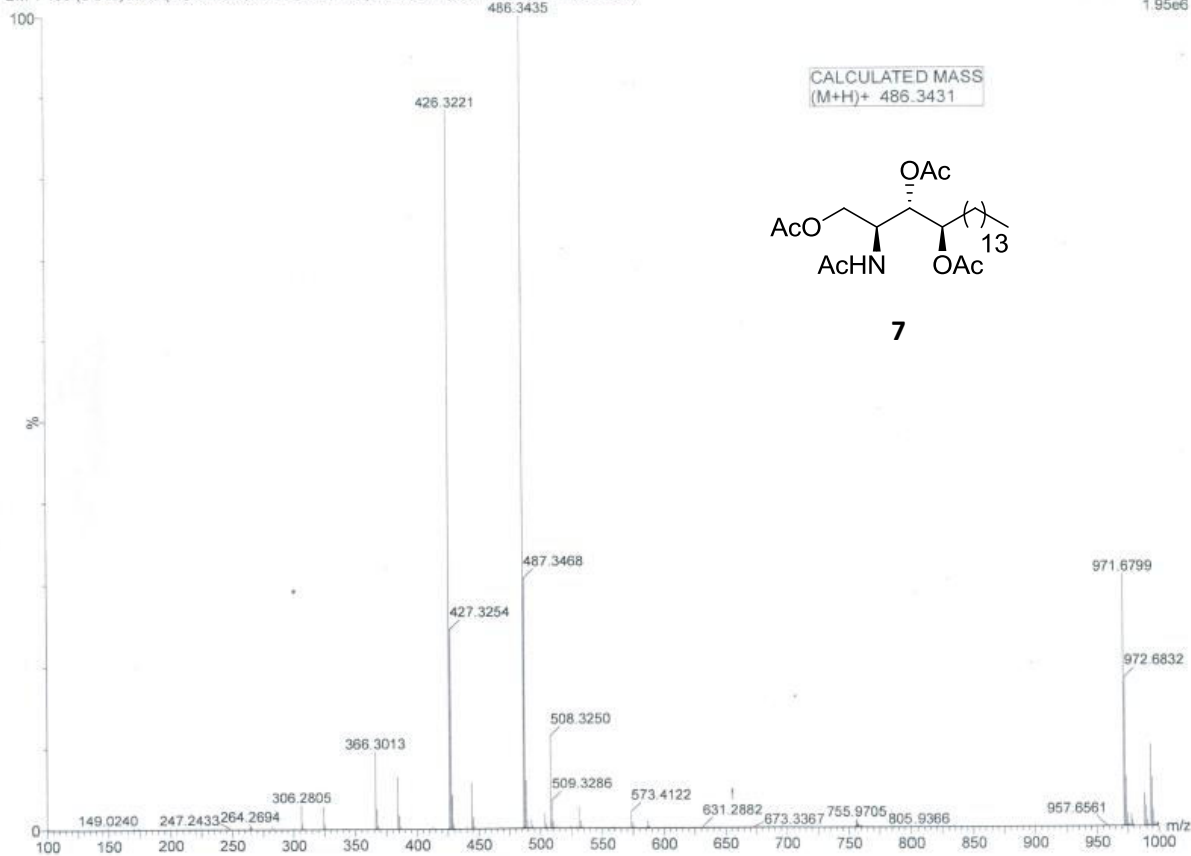

CALCULATED MASS  
(M+H)<sup>+</sup> 486.3431

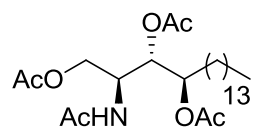

7



Analyst  
Date  
NCL  
16 July 2014 15:31:12

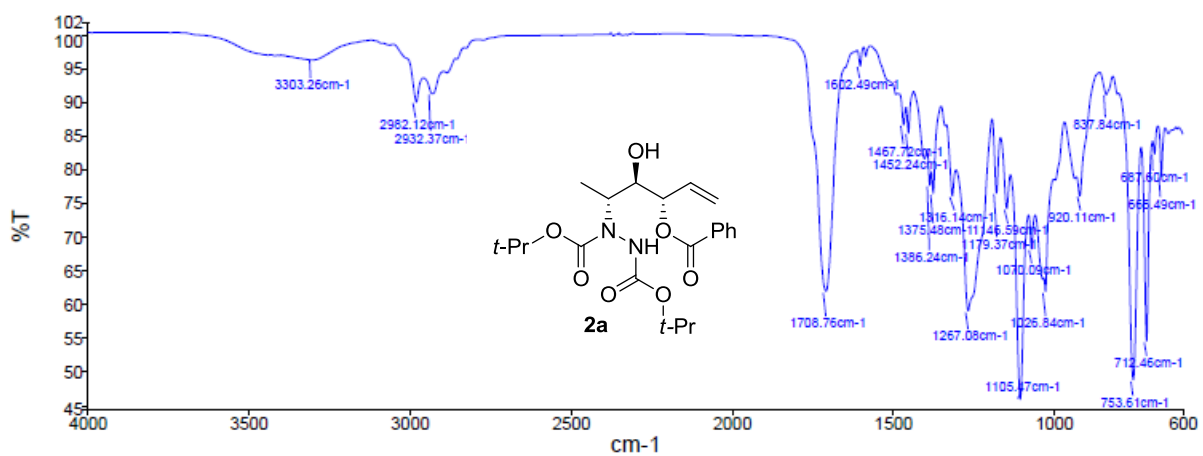

| Sample Name | Description                             | Quality Checks                                                          |
|-------------|-----------------------------------------|-------------------------------------------------------------------------|
| BB1         | BB1 By nol Date Wednesday, July 16 2014 | The Quality Checks give rise to a Window Cutoff warning for the sample. |
